1 **Characterization of fluorescent proteins, promoters, and selectable markers for applications in the**  
2 **Lyme disease spirochete *Borrelia burgdorferi*.**

3 Constantin N. Takacs<sup>1,2,3</sup>, Molly Scott<sup>1,2,3</sup> and Christine Jacobs-Wagner<sup>1,2,3,4,\*</sup>

4 <sup>1</sup> Microbial Sciences Institute, Yale West Campus, West Haven, CT, 06516, USA.

5 <sup>2</sup> Department of Molecular, Cellular, and Developmental Biology, Yale University, New Haven, CT,  
6 06511, USA.

7 <sup>3</sup> Howard Hughes Medical Institute, Yale West Campus, West Haven, CT, 06516, USA.

8 <sup>4</sup> Department of Microbial Pathogenesis, Yale School of Medicine, New Haven, CT, 06536, USA

9 \* To whom correspondence should be addressed. Tel: +1 203 737-6778; Fax: +1 203 737-6715; Email:  
10 christine.jacobs-wagner@yale.edu.

11

12

13 **ABSTRACT**

14 Lyme disease is the most widely reported vector-borne disease in the United States. Its incidence is  
15 rapidly increasing and disease symptoms can be debilitating. The need to understand the biology of the  
16 disease agent, the spirochete *Borrelia burgdorferi*, is thus evermore pressing. Despite important  
17 advances in *B. burgdorferi* genetics, the array of molecular tools available for use in this organism  
18 remains limited, especially for cell biological studies. Here, we adapt a palette of bright and mostly  
19 monomeric fluorescent proteins for versatile use and multi-colour imaging in *B. burgdorferi*. We also  
20 characterize two novel antibiotic selection markers and establish the feasibility of their use in  
21 conjunction with extant markers. Lastly, we describe a set of constitutively active promoters of low and  
22 intermediate strengths that allow fine-tuning of gene expression levels. These molecular tools  
23 complement and expand current experimental capabilities in *B. burgdorferi*, which will facilitate future  
24 investigation of this important human pathogen.

25

## 26 INTRODUCTION

27 Lyme disease, a widespread infection transmitted by hard ticks of the *Ixodes* genus, is the most  
28 prevalent vector-borne disease in the United States. The condition is also common in Europe and Asia,  
29 and its incidence and geographic distribution have been steadily increasing in recent decades (1). Lyme  
30 disease is caused by spirochetal bacteria belonging to the *Borrelia burgdorferi* sensu lato group, with *B.*  
31 *burgdorferi* sensu stricto (from here-on referred to as *B. burgdorferi*) being the principal agent in North  
32 America, and *B. afzelii* and *B. garinii* being the primary agents in Eurasia. In humans, acute Lyme  
33 disease is often associated with a characteristic skin rash and flu-like symptoms. If left untreated, late  
34 stages of infection may result in carditis, neurological manifestations, and arthritis (2).

35 Spirochetes in general, and the *Borrelia* species in particular, display cellular features unusual for  
36 bacteria (3). Spirochete cells are typically very long and thin by bacterial standards. *B. burgdorferi* cells,  
37 for example, are 10 to 25  $\mu\text{m}$  long and  $\sim 250$  nm wide (4-6). Spirochetes are also highly motile, but,  
38 unlike in most bacteria, their flagella are not external organelles (7). Instead, their flagella are located in  
39 the periplasm (i.e., between the inner and outer membranes). In *B. burgdorferi*, the helicity of the  
40 flagella imparts the flat-wave morphology of the bacterium (8). *B. burgdorferi* also possesses what is  
41 likely the most segmented genome of all bacteria analysed to date. It is made up of a linear chromosome  
42 of about 900 kilobases (kb) and over 20 linear and circular genetic elements ranging from 5 to 60 kb in  
43 length (9,10). These smaller genetic elements are often referred to as plasmids, though many of them  
44 encode proteins that are essential for the life cycle of this organism (11). Recent work from our  
45 laboratory has shown that *Borreliac* species also have an uncommon pattern of cell wall synthesis in  
46 which discrete zones of cell elongation in one generation predetermine the division sites of daughter  
47 cells in the next generation (6).

48 While these unusual cellular features are integral to *B. burgdorferi* physiology and pathogenesis, little  
49 is known about how they arise or are maintained over generations. In fact, the cell biology of this  
50 pathogen remains largely unexplored. Technical hurdles have slowed progress in this area. Genetic  
51 manipulation of *B. burgdorferi* is feasible, but the available genetic tools are still limited, and the  
52 process remains cumbersome (12,13). Constitutive gene expression is mostly limited to the use of very  
53 strong promoters. Moreover, apart from a few exceptions (14-19), fluorescent protein reporters have  
54 primarily been used as gene expression reporters or as cellular stains for *in vivo* localization of the  
55 spirochete (13). Yet fluorescent proteins have many more uses, which have transformed the field of cell  
56 biology (20). For example, fluorescent proteins have opened the door to localization studies in live cells.  
57 They have also facilitated the detection of protein-protein interactions, the measurement of physical

58 properties of the cell, and the analysis of single events and of population heterogeneity. Much of this  
59 information is not accessible through the use of bulk biochemical measurements on cell populations.  
60 The averaging inherent to such techniques leads to loss of spatial resolution and obscures rare events and  
61 cell-to-cell or subcellular heterogeneity of behaviour (21). Indeed, the ability to perform extensive  
62 genetic manipulations and to use a wide panel of fluorescent proteins in an organism has been key to  
63 progress in understanding bacterial cell biology (22). Such approaches have been extensively used in  
64 model bacteria such as *Bacillus subtilis*, *Escherichia coli*, and *Caulobacter crescentus* since the first  
65 reported use of fluorescent protein fusions two decades ago (23-25). In order to facilitate the study of *B.*  
66 *burgdorferi*, we have generated new investigative tools by characterizing a panel of fluorescent proteins,  
67 promoters and antibiotic resistance markers for use in this medically important bacterium.

68

## 69 MATERIAL AND METHODS

### 70 Bacteria, growth conditions, and genetic transformations

71 Bacterial strains used in this study are listed in Table 1. *E. coli* strains were grown at 30 °C in liquid  
72 culture in Super Broth medium (35 g/L bacto-tryptone, 20 g/L yeast extract, 5 g/L NaCl, 6 mM NaOH)  
73 with shaking, or on LB agar plates. Plasmids were transformed by electroporation or heat shock. For  
74 selection of *E. coli* strains we used 200 µg/mL (solid medium) or 100 µg/mL (liquid medium) ampicillin,  
75 20 µg/mL (solid medium) or 15 µg/mL (liquid medium) gentamicin, 50 µg/mL kanamycin (solid and  
76 liquid media), 50 µg/mL spectinomycin (solid medium), 50 µg/mL streptomycin (liquid medium), and  
77 25 µg/mL (liquid medium) or 50 µg/mL (solid medium) rifampicin.

78 *B. burgdorferi* strains were grown in BSK-II medium supplemented with 6% (vol/vol) heat  
79 inactivated rabbit serum (Sigma Aldrich or Gibco) or in complete BSK-H medium (Sigma Aldrich), as  
80 previously described (26-28). Cultures were incubated at 34 °C under 5% CO<sub>2</sub> atmosphere in a  
81 humidified incubator. Antibiotics were used at the following concentrations (unless otherwise indicated):  
82 gentamicin at 40 µg/mL, streptomycin at 100 µg/mL, kanamycin at 200 µg/mL, blasticidin S at 10  
83 µg/mL, and hygromycin B at 250 µg/mL. Ampicillin was purchased from Fisher Scientific, blasticidin S  
84 and hygromycin B from Invivogen, and all other antibiotics and biliverdin hydrochloride from Sigma  
85 Aldrich.

86

87

88

## 89 ***B. burgdorferi* strain generation**

90 *B. burgdorferi* electrocompetent cells were prepared as previously described (29) and were  
91 transformed with shuttle vector plasmid DNA (usually 30 µg) by electroporation. Electroporated cells  
92 were then allowed to recover overnight in BSK-II medium at 34 °C. The next day, antibiotic selection  
93 was initiated and 5-fold serial dilutions of the culture were plated in a 96-well plate (24 wells for each  
94 dilution). After 10-14 days of incubation, the wells were inspected by microscopy using dark-field  
95 illumination. When fewer than 20% of the wells of a given dilution were positive for growth, those wells  
96 were considered to contain clonal populations and were further expanded and characterized. When  
97 appropriate, fluorescence imaging was used to confirm fluorescent protein expression. Alternatively,  
98 selected, non-clonal transformant populations were enumerated using C-Chip disposable  
99 hemacytometers (INCYTO), using the manufacturer's instructions with the following change: counting  
100 was done by continuously scanning the full height of the counting chamber for each counting surface to  
101 account for the height of the counting chamber being larger than the size of the spirochetes. Enumerated  
102 spirochetes were then diluted in BSK-II media and plated in 96-well plates at an average density of 0.2  
103 cells/well. After 10-14 days, clonal growth was confirmed by dark-field microscopy imaging.

104

## 105 **Determination of minimal inhibitory concentrations (MIC) and antibiotic cross-resistance**

106 MICs were determined using strains B31 e2 or B31 MI, while cross-resistance testing was done  
107 using B31 e2-derived strains that contained shuttle vectors carrying kanamycin, gentamicin,  
108 streptomycin, blasticidin S, or hygromycin B resistance markers (see strains CJW\_Bb069 through  
109 CJW\_Bb073 in Table 1). For both tests, antibiotics were two-fold serially diluted in complete medium.  
110 For each concentration, 100 µL of antibiotic solution were dispensed into two to four wells of 96-well  
111 plates. The cell density of *B. burgdorferi* cultures was determined by direct counting using dark-field  
112 microscopy. The cultures were then diluted to  $2 \times 10^4$  cells/mL in antibiotic-free medium, and 100 µL of  
113 this diluted culture were added to the antibiotic-containing wells to yield an inoculum of  $10^4$  cells/mL.  
114 The plates were incubated for at least 4 days at 34 °C under 5% CO<sub>2</sub> atmosphere in a humidified  
115 incubator, after which each well was checked for spirochete growth and motility using dark-field  
116 microscopy. A well was marked as positive if motile cells were detected. The plates were further  
117 incubated for several days, during which bacterial growth-dependent acidification caused the phenol-red  
118 pH indicator in the medium to change colour. This colour change was documented using colourimetric  
119 trans-illumination imaging on a GE Amersham Imager 600. We verified that growth scoring of each  
120 well by dark-field imaging matched the observed medium colour change.

121

## 122 DNA manipulations

123 Plasmids used in this study are listed in Table 2. Methods of plasmid construction and sequences of  
124 oligonucleotide primers are provided as Supplementary Data. Standard molecular biology techniques  
125 were used, as detailed in the Supplementary Data. Codon optimisation was performed using the web-  
126 based Java Codon Adaptation Tool hosted at [www.jcat.de](http://www.jcat.de) (30), using the codon usage table for *B.*  
127 *burgdorferi* as stored at [www.kazusa.or.jp/codon](http://www.kazusa.or.jp/codon) (31). Codon-optimised DNA sequences were then  
128 chemically synthesized at Genewiz. DNA sequences of each codon-optimised gene are provided in the  
129 Supplementary Data. The names of these genes include a *Bb* superscript to indicate that the gene's  
130 nucleotide sequence is codon-optimised for translation in *B. burgdorferi* (e.g. *iRFP<sup>Bb</sup>*). The name of the  
131 protein encoded by such a gene (e.g. iRFP), however, does not include the *Bb* superscript, as the  
132 protein's amino acid sequence does not differ from that expressed from other versions of the gene.

133

## 134 Microscopy

135 Visualization and counting of live spirochetes were done using a Nikon Eclipse E600 microscope  
136 equipped with dark-field illumination optics and a Nikon 40X 0.55 numerical aperture (NA) phase  
137 contrast air objective. Phase contrast and fluorescence imaging was done on a Nikon Eclipse Ti  
138 microscope equipped with a 100X Plan Apo 1.40 NA phase contrast oil objective, a Hamamatsu Orca-  
139 Flash4.0 V2 Digital CMOS camera, a Sola light engine (Lumencor), and controlled by the Metamorph  
140 software (Molecular Devices). Alternatively, light microscopy was performed on a Nikon Ti microscope  
141 equipped with a 100X Plan Apo 1.45 NA phase contrast oil objective, a Hamamatsu Orca-Flash4.0 V2  
142 CMOS camera, a Spectra X light engine (Lumencor) and controlled by the Nikon Elements software.  
143 Excitation of iRFP was achieved using the 640/30 nm band of the SpectraX system, but higher  
144 excitation efficiency and thus brightness could in theory be obtained using a red-shifted excitation  
145 source between 660 and 680 nm. The following Chroma filter sets were used to acquire fluorescence  
146 images: CFP (excitation ET436/20x, dichroic T455lp, emission ET480/40m), GFP (excitation  
147 ET470/40x, dichroic T495lpxr, emission ET525/50m), YFP (excitation ET500/20x, dichroic T515lp,  
148 emission ET535/30m), mCherry/TexasRed (excitation ET560/40x, dichroic T585lpxr, emission  
149 ET630/75m), and Cy5.5 (excitation ET650/45x, dichroic T685lpxr, emission ET720/60m). For imaging,  
150 cultures were inoculated at densities between  $10^3$  and  $10^5$  cells/mL, and were grown for two to three  
151 days to reach densities between  $10^6$  and  $3 \times 10^7$  cells/mL. The cells were then immobilized on a 2%  
152 agarose pad (6,32) made with phosphate buffered saline covered with a No. 1.5 coverslip, after which  
153 the cells were immediately imaged live. Images were processed using the Metamorph software. Figures  
154 were generated using Adobe Illustrator software.

## 155 **Image analysis**

156 Cell outlines were generated using phase contrast images and the open-source image analysis  
157 software Oufiti (33). Outlines were checked visually for each cell and were extended manually to the full  
158 length of the cells when appropriate. When not assigned to single cells or assigned to non-cellular debris,  
159 outlines were manually removed. The remaining outlines were automatically refined using the Refine  
160 All function of the software. Fluorescence signal data was added to the cells in Oufiti. The resulting cell  
161 lists were processed using the MATLAB script addMeshtoCellList.m (see Supplementary Data for the  
162 code). This script uses the functions CL\_getframe.m, CL\_removeCell.m, CL\_cellId2PositionInFrame.m,  
163 and getextradata.m which were previously described (33). Single cell fluorescence intensity values were  
164 calculated by dividing the total fluorescence signal inside a cell mesh by the cell mesh area using the  
165 MATLAB-based function CalculateFluorPerCell.m. Final fluorescence data were plotted using the  
166 GraphPad Prism 5 software. The number of cells analysed for each condition is provided in the  
167 Supplementary Data.

168

## 169 **RESULTS**

### 170 **A wide palette of fluorescent proteins for imaging in *B. burgdorferi***

171 Only a few fluorescent proteins have been used to date in *B. burgdorferi* (summarized in Table 3).  
172 These proteins belong primarily to two colour classes: green fluorescent proteins (GFP) and red  
173 fluorescent proteins (RFP) (Table 3). To expand the range of options for multi-colour imaging of *B.*  
174 *burgdorferi*, we focused on a set of fluorescent proteins that have been used in localization studies in  
175 other organisms and codon-optimised their genes for translation in *B. burgdorferi*. The selected proteins  
176 span five colour classes (Table 3) and their signal can be collected using widely available filter sets for  
177 cyan fluorescent protein (CFP), GFP, yellow fluorescent protein (YFP), mCherry/TexasRed and Cy5.5  
178 fluorescence. The selected cyan, green, and yellow variants are all derivatives of the jellyfish (*Aequorea*  
179 *victoria*) GFP. We used both the classic variants Cerulean (34), enhanced GFP, or EGFP (35), Citrine  
180 (36), as well as the superfolder (e.g., sfGFP) variants (37). All variants included the monomeric  
181 mutation A206K (38), denoted by a lower case m before the name of the protein (e.g., mCerulean). Our  
182 red protein of choice was mCherry (39), a monomeric, improved variant of mRFP1. Lastly, we codon-  
183 optimised and expressed an infrared fluorescent protein, iRFP (40). The far-red wavelengths used to  
184 excite this fluorophore are less toxic to cells than the shorter excitation wavelengths used for the other  
185 fluorescent proteins, and the sample autofluorescence in the near-infrared spectral region is lower than  
186 in the other, blue-shifted imaging windows (20,41).

187 To visualize these fluorescent proteins, we expressed them in strain B31 e2 from the strong flagellin  
188 promoter  $P_{flaB}$  (42) located on a shuttle vector. With the exception of iRFP, each fluorescent protein  
189 displayed bright fluorescence when imaged using a filter set matched to its colour (Figure 1A). Unlike  
190 the other fluorescent proteins, which oxidatively conjugate their own amino acid side chains to create a  
191 fluorophore (20), iRFP covalently binds an exogenous biliverdin molecule, which then serves as the  
192 fluorophore (40). Adding the biliverdin cofactor to the growth medium of the iRFP-expressing strain  
193 rendered the cells fluorescent in the near-infrared region of the spectrum, as detected with a Cy5.5 filter  
194 set (Figure 1B). Treating a control strain carrying an empty shuttle vector with biliverdin did not cause  
195 any increase in cellular fluorescence (data not shown). To measure cellular fluorescence levels, we  
196 chose a microscopy-based approach in conjunction with quantitative image analysis. This allowed us to  
197 efficiently analyse hundreds of cells and to clearly distinguish individual cells from similarly-sized  
198 debris found in the culture medium, or from clumps of multiple cells. Using this method, we established  
199 that a 4  $\mu$ M concentration of biliverdin in the growth medium was sufficient to achieve maximal cellular  
200 brightness (Figure 1C). Close-to-maximal iRFP brightness was reached as early as an hour after addition  
201 of biliverdin to the culture and was maintained throughout subsequent growth (Figure 1D). Furthermore,  
202 continuous growth of *B. burgdorferi* in the presence of biliverdin was indistinguishable from growth in  
203 biliverdin-free medium (Figure 1E). This indicates that culture experiments that involve iRFP may be  
204 performed either by adding biliverdin shortly before imaging or by growing the cells continuously in the  
205 presence of biliverdin.

206 In microscopy studies, simultaneous imaging of multiple fluorescent proteins requires that the signal  
207 generated by a given fluorescent protein does not overlap with the fluorescence channels used to collect  
208 the signal of another protein. To assess the viability of using our palette of fluorescent proteins for multi-  
209 colour imaging in *B. burgdorferi*, we quantified the signal generated by each fluorescent protein when  
210 imaged with the commonly used CFP, GFP, YFP, mCherry, and Cy5.5 filter cubes (Figure 2). We found  
211 that each fluorescent protein generated a strong signal when imaged with a colour-matched filter set  
212 (Figure 2). As expected, we detected a significant spectral overlap between CFP and GFP, as well as  
213 between GFP and YFP variants. Importantly, signal quantification showed that mCerulean or msfCFP  
214 can be imaged alongside mCitrine, mCherry, and iRFP, while mEGFP or msfGFP can be imaged  
215 alongside mCherry and iRFP, opening the door to combinatorial imaging of up to four proteins in the  
216 same *B. burgdorferi* cell.

217

## 218 **Promoters for various levels of constitutive expression in *B. burgdorferi*.**

219 To date, constitutive expression of exogenous genes in *B. burgdorferi*, including antibiotic selection  
220 markers and reporter genes such as fluorescent proteins and luciferases, has almost exclusively relied on  
221 very strong promoters such as  $P_{flaB}$  and  $P_{flgB}$  (13,42). Reporter expression from strong promoters  
222 facilitates spirochete detection, particularly in high fluorescence background environments such as the  
223 tick midgut or mammalian tissues (43-45). However, as overexpression can affect protein localization,  
224 interfere with function, or cause cellular toxicity (e.g. (46-56)), low gene expression has proven  
225 instrumental in facilitating localization studies (e.g. (57-60)) and is often preferred in such applications.

226 To identify constitutively expressed promoters of low and medium strengths, we mined a published  
227 RNA sequencing (RNA-seq) dataset that measured transcript levels in cultures of *B. burgdorferi* in  
228 early-exponential, mid-exponential and stationary phases (61). We selected five genes whose expression  
229 was largely unchanged among the three growth phases tested (Figure 3A), amplified a DNA region  
230 upstream of each gene's translational start site, and fused it to an mCherry reporter in a kanamycin-  
231 resistant shuttle vector (Figure 3B). The amplified putative promoter sequences ranged in size between  
232 129 and 212 base pairs (bp) and included the reported 5' untranslated regions (5'UTR) of these *B.*  
233 *burgdorferi* genes (61,62). We also included in our analysis an empty vector and a vector containing a  
234  $P_{flaB}$ -mCherry<sup>Bb</sup> fusion, which served as references for no and high expression, respectively.

235 We transformed these constructs into *B. burgdorferi*, imaged the resulting strains, and quantified the  
236 fluorescence level in each cell. All promoters elicited fluorescence levels above the background of the  
237 strain carrying the empty vector (Figure 3C). We noticed differences between the RNA-seq and  
238 mCherry reporter methods of measuring promoter strength, as detailed in the discussion. Importantly,  
239 however, the promoters we tested displayed a broad dynamic range from low ( $P_{0526}$ ) to intermediate  
240 ( $P_{0826}$ ,  $P_{resT}$ ,  $P_{0031}$ , and  $P_{0026}$ ) to high ( $P_{flaB}$ ) strength.

## 241 **Antibiotic selection in *B. burgdorferi* using hygromycin B and blasticidin S resistance markers**

242 Several antibiotic resistance markers have been used to perform genetic manipulations in *B.*  
243 *burgdorferi* and have recently been reviewed in detail (13). The most widely used today are the  
244 kanamycin (*aphI*), gentamicin (*aacCI*), streptomycin (*aadA*) and erythromycin (*ermC*) resistance genes  
245 (see Table 4) (42,63-65). Use of several other antibiotics for selection is either ineffective (e.g. zeocin,  
246 chloramphenicol, and puromycin), discouraged due to safety concerns (e.g. tetracyclines,  $\beta$ -lactams, and  
247 sometimes erythromycin), redundant due to cross-resistance (several aminoglycoside antibiotics), or no



248 longer widespread (coumermycin A<sub>1</sub>) due to alterations in cell physiology induced by both the antibiotic  
249 and the resistance marker (13,64).

250 To expand the panel of antibiotic resistance markers that can be used in *B. burgdorferi*, we focused  
251 on two antibiotics commonly used for selection of eukaryotic cells, namely the translation inhibitors  
252 hygromycin B and blasticidin S. Rendering *B. burgdorferi* resistant to them does not pose a biosafety  
253 concern, as these antibiotics are not used to treat Lyme disease. We found that hygromycin B and  
254 blasticidin S prevented *B. burgdorferi* growth in liquid culture at concentrations of 200 and 5 µg/mL,  
255 respectively (Table 4). For resistance cassettes, we used the *E. coli* gene *hph* (also known as *aph(4)-Ia*),  
256 which encodes a hygromycin B phosphotransferase, and the *Aspergillus terreus* gene *bsd*, which  
257 encodes a blasticidin S deaminase (66-68). We codon-optimised these genes for translation in *B.*  
258 *burgdorferi* and placed them under the control of the strong P<sub>flgB</sub> promoter on a shuttle vector (Figure  
259 4A). The resulting vectors, pBSV2H and pBSV2B, also carry the rifampicin resistance gene *arr-2* of  
260 *Pseudomonas aeruginosa* (69-71), which encodes a rifampicin ADP-ribosyltransferase. *B. burgdorferi* is  
261 naturally resistant to rifampicin (72,73), but the use of rifampicin for selection in *E. coli* instead of the  
262 more expensive blasticidin S and hygromycin B antibiotics reduces the cost of generating and  
263 propagating the vectors in *E. coli*.

264 *B. burgdorferi* strains obtained by transforming pBSV2B or pBSV2H into B31 e2 grew readily in  
265 cultures containing 10 µg/mL blasticidin S or 250 µg/mL hygromycin B, respectively. We used these  
266 strains to test whether the antibiotic resistance cassettes encoded by these vectors conferred any cross-  
267 resistance to the often-used antibiotics kanamycin, gentamicin, streptomycin, and erythromycin. In  
268 parallel, we performed reciprocal tests using B31 e2-derived strains that carried a kanamycin,  
269 gentamicin, or streptomycin resistance cassette. Each culture was grown in the presence of two-fold  
270 serial dilutions of each antibiotic (Figure 4B). Each dilution series was centred on the concentration  
271 routinely used for selection with each of the tested antibiotics (Figure 4B, arrow). We grew the cultures  
272 for at least four days and then inspected each well for growth by dark-field imaging. A well was  
273 considered to be growth-positive if we detected at least one motile spirochete after scanning a minimum  
274 of five fields of view. In addition, we further incubated the plates to allow for growth-dependent  
275 acidification of the medium. This pH change is easily detected as a medium colour change from red,  
276 denoting no growth, to orange or yellow, denoting various degrees of growth (Figure 4C-H) (64). We  
277 confirmed that wells with the lowest antibiotic concentration at which the medium remained red also did  
278 not contain motile spirochetes. This concentration was taken to represent the minimum inhibitory  
279 concentration, or MIC (Figure 4C, black line). Whenever we exposed a strain to the antibiotic to which

280 it carried a resistance gene, we readily detected growth at all antibiotic concentrations tested (Figure 4D-  
281 H), highlighting the efficacy of each resistance marker. Importantly, we did not detect any major cross-  
282 resistance between the five resistance markers and the six antibiotics tested (Figure 4D-H). One  
283 exception was the kanamycin-resistant strain CJW\_Bb069, which was able to grow in the presence of as  
284 much as 40 µg/mL gentamicin (Figure 4E), a concentration routinely used for gentamicin selection (64).  
285 A slightly higher amount of gentamicin (80 µg/mL) was, however, sufficient to kill this kanamycin-  
286 resistant strain (Figure 4E). This low level of cross-resistance may thus necessitate use of a higher dose  
287 of gentamicin for selection if the parental strain is already kanamycin-resistant.

## 288 **DISCUSSION**

289 We have undertaken this work to facilitate microscopy-based investigations of the biology of the  
290 Lyme disease agent *B. burgdorferi*. We expanded the available molecular toolkit by characterizing  
291 antibiotic resistance markers, fluorescent proteins and constitutively active promoters not previously  
292 used in this organism.

293 Alongside the commonly used kanamycin, gentamicin, streptomycin, and erythromycin selection  
294 markers, the addition of hygromycin B and blasticidin S resistances as useful selection markers will  
295 provide more flexibility in designing genetic modifications. A wider array of non-cross-resistant  
296 selection markers is particularly important in the absence of a streamlined method to create unmarked  
297 genetic modifications in this bacterium (13). Currently, in infectious *B. burgdorferi* strains, an antibiotic  
298 resistance marker is commonly used to inactivate the restriction modification system encoded by the  
299 *bbe02* locus on plasmid lp25. This inactivation increases the efficiency of transformation with shuttle  
300 vectors. It also helps maintain this plasmid in the cell population during *in vitro* growth through  
301 selective pressure (74-77). This step is essential for maintaining a strain's infectivity, as linear plasmid  
302 lp25 is essential *in vivo* but is often rapidly lost during genetic manipulations and growth in culture  
303 (78,79). A second resistance marker is often used to inactivate a gene of interest, either by targeted  
304 deletion or by transposon insertion mutagenesis. A third resistance marker is needed for  
305 complementation, either at the original locus, or *in trans*. Additional markers are needed if two genes are  
306 to be inactivated and complemented simultaneously, or if several localization reporters need to be  
307 expressed both simultaneously and independently.

308 Today's cell biology investigations often rely on microscopy studies using fluorescent protein fusions.  
309 Prior to our work, green and red fluorescent proteins have been the reporters of choice in *B. burgdorferi*  
310 microscopy studies (Table 3), and only a handful of subcellular localization and topology studies had

311 been performed using these tools (13-19). We have expanded the palette of fluorescent proteins that can  
312 be used in this bacterium by adding several proteins with properties highly desirable for imaging and  
313 localization studies. These fluorescent proteins are among the brightest of their classes (20,37,40), and  
314 their spectral properties render them appropriate for simultaneous multi-colour imaging of up to four  
315 targets. For the most part, they are also monomeric, as all of the *A. victoria* GFP, CFP, and YFP variants  
316 that we have generated carry the A206K mutation (38). Using monomeric fluorescent proteins may be  
317 important to prevent artifactual intermolecular interactions, (e.g. (38,80,81)). Should the weakly dimeric  
318 versions of these proteins be required for specific applications, the A206K mutation can be easily  
319 reversed by site-directed mutagenesis. The superfolder variants of these proteins may facilitate tagging  
320 when the folding of the fusion protein is otherwise impaired (37). In addition, unlike EGFP, which does  
321 not fold in the periplasm of diderm bacteria when exported through the Sec protein translocation system,  
322 sfGFP does fold in the periplasm (82). It can therefore be an alternative to mRFP1 and mCherry for  
323 tagging periplasmic and outer-surface-exposed proteins. This is particularly relevant for the study of *B.*  
324 *burgdorferi* since this bacterium expresses an unusually large number of lipoproteins that are localized  
325 on the cell surface or in the periplasmic space (83). In addition, although dimeric, iRFP may serve as a  
326 useful *in vivo* marker, and may be preferable to GFP and RFP. Excitation light penetrance in live tissues  
327 is better in the far-red/near-infrared region of the spectrum than in the blue-shifted regions used to excite  
328 GFP or RFP. Furthermore, tissue autofluorescence in this spectral region is lower, which further  
329 facilitates imaging (84,85). Lastly, the levels of biliverdin found in animal tissues are in the low  
330 milimolar range, with healthy human plasma containing 0.9-6.5  $\mu\text{M}$  biliverdin (86). In our hands, such  
331 biliverdin levels are sufficient to elicit maximal fluorescence of *B. burgdorferi*-expressed iRFP.  
332 Furthermore, iRFP has been successfully used to label *Neisseria meningitidis* bacteria for *in vivo*  
333 imaging (87). Altogether, these considerations indicate that imaging in mice using iRFP-expressing *B.*  
334 *burgdorferi* should be feasible.

335 We also characterized promoters of low and intermediate strengths and demonstrated that variable  
336 degrees of constitutive gene expression can be easily achieved in *B. burgdorferi*. The relative order of  
337 promoter strength, as quantified using the mCherry reporter (Figure 3E), largely matched the order of  
338 the expression levels of the corresponding genes in culture (Figure 3A) (61), with the exceptions of P<sub>0526</sub>  
339 and P<sub>0826</sub>. While P<sub>0526</sub> had an intermediate strength as measured by RNA-seq, it was the weakest when  
340 tested using our reporter system. In contrast, P<sub>0826</sub> was the weakest promoter based on RNA-seq data,  
341 but displayed intermediate strength in our experiments. The differences may arise from strain  
342 differences or from our use of short DNA sequences of 129 to 212 bp, which presumably contain

343 minimal promoter sequences. Any native regulatory elements located further upstream of these short  
344 promoter sequences are thus absent in our reporter plasmids. Differences in expression levels may also  
345 be caused by reporter expression from circular shuttle vectors.  $P_{0526}$  and  $P_{0826}$  are natively located on the  
346 chromosome and differences in DNA topology, including supercoiling, between the chromosome and  
347 the circular plasmids are known to affect gene expression in *B. burgdorferi* (88,89). Finally, it is worth  
348 noting that while both *bb0526* and *bb0826* encode leaderless transcripts, *bb0826* has a secondary  
349 transcriptional start site located 54 bp upstream of the translational start site (62). This difference may  
350 also partly explain the observed promoter strength mismatch between the native gene and reporter fusion.  
351 Regardless of the reason for these discrepancies, these promoters will facilitate complementation and  
352 localization studies where medium and low gene expression levels may be required.

353 In summary, our study describes novel molecular tools that we hope will aid investigations in the  
354 Lyme disease field and spur further progress in the study of this medically important and highly unusual  
355 bacterium.

#### 356 **AVAILABILITY**

357 Sequences of all the plasmids constructed in this study are available upon request. The DNA sequences  
358 of the various genes that were codon-optimised for expression in *B. burgdorferi* are provided in the  
359 Supplementary Data. The MATLAB code used to process cell fluorescence data is also provided as  
360 Supplementary Data.

#### 361 **ACCESSION NUMBERS**

362 None.

#### 363 **SUPPLEMENTARY DATA**

364 Supplementary Data are available in the accompanying document. It contains detailed plasmid  
365 construction methods, a list of oligonucleotide primer sequences used in this study, DNA sequences of  
366 genes that were codon-optimised for translation in *B. burgdorferi*, a record of cell numbers for each  
367 figure describing quantitative fluorescence data, MATLAB code used in this study, and supplementary  
368 references.

#### 369 **ACKNOWLEDGEMENT**

370 We thank Nicholas Jannetty for help with cloning experiments and Dr. Bradley Parry for help with the  
371 computational analyses. We are also grateful to Drs. Brandon Jutras and Patricia Rosa, as well as to the

372 members of the Jacobs-Wagner laboratory for helpful discussions and/or critical reading of the  
373 manuscript.

#### 374 **FUNDING**

375 This work was supported by the Howard Hughes Medical Institute. C.J.-W. is an Investigator of the  
376 Howard Hughes Medical Institute.

#### 377 **CONFLICT OF INTEREST**

378 The authors are aware of no conflict of interest.

#### 379 **REFERENCES**

- 380 1. Mead, P.S. (2015) Epidemiology of Lyme disease. *Infectious disease clinics of North America*, **29**,  
381 187-210.
- 382 2. Steere, A.C., Strle, F., Wormser, G.P., Hu, L.T., Branda, J.A., Hovius, J.W., Li, X. and Mead, P.S.  
383 (2016) Lyme borreliosis. *Nature reviews. Disease primers*, **2**, 16090.
- 384 3. Holt, S.C. (1978) Anatomy and chemistry of spirochetes. *Microbiological reviews*, **42**, 114-160.
- 385 4. Kudryashev, M., Cyrklaff, M., Baumeister, W., Simon, M.M., Wallich, R. and Frischknecht, F.  
386 (2009) Comparative cryo-electron tomography of pathogenic Lyme disease spirochetes. *Molecular*  
387 *microbiology*, **71**, 1415-1434.
- 388 5. Hovind-Hougen, K. (1984) Ultrastructure of spirochetes isolated from Ixodes ricinus and Ixodes  
389 dammini. *The Yale journal of biology and medicine*, **57**, 543-548.
- 390 6. Jutras, B.L., Scott, M., Parry, B., Biboy, J., Gray, J., Vollmer, W. and Jacobs-Wagner, C. (2016)  
391 Lyme disease and relapsing fever *Borrelia* elongate through zones of peptidoglycan synthesis that  
392 mark division sites of daughter cells. *Proceedings of the National Academy of Sciences of the United*  
393 *States of America*, **113**, 9162-9170.
- 394 7. Charon, N.W., Cockburn, A., Li, C., Liu, J., Miller, K.A., Miller, M.R., Motaleb, M.A. and  
395 Wolgemuth, C.W. (2012) The unique paradigm of spirochete motility and chemotaxis. *Annual*  
396 *review of microbiology*, **66**, 349-370.
- 397 8. Motaleb, M.A., Corum, L., Bono, J.L., Elias, A.F., Rosa, P., Samuels, D.S. and Charon, N.W. (2000)  
398 *Borrelia burgdorferi* periplasmic flagella have both skeletal and motility functions. *Proceedings of*  
399 *the National Academy of Sciences of the United States of America*, **97**, 10899-10904.
- 400 9. Fraser, C.M., Casjens, S., Huang, W.M., Sutton, G.G., Clayton, R., Lathigra, R., White, O., Ketchum,  
401 K.A., Dodson, R., Hickey, E.K. *et al.* (1997) Genomic sequence of a Lyme disease spirochaete,  
402 *Borrelia burgdorferi*. *Nature*, **390**, 580-586.
- 403 10. Casjens, S., Palmer, N., van Vugt, R., Huang, W.M., Stevenson, B., Rosa, P., Lathigra, R., Sutton,  
404 G., Peterson, J., Dodson, R.J. *et al.* (2000) A bacterial genome in flux: the twelve linear and nine  
405 circular extrachromosomal DNAs in an infectious isolate of the Lyme disease spirochete *Borrelia*  
406 *burgdorferi*. *Molecular microbiology*, **35**, 490-516.
- 407 11. Radolf, J.D., Caimano, M.J., Stevenson, B. and Hu, L.T. (2012) Of ticks, mice and men:  
408 understanding the dual-host lifestyle of Lyme disease spirochaetes. *Nature reviews. Microbiology*,  
409 **10**, 87-99.
- 410 12. Rosa, P.A., Tilly, K. and Stewart, P.E. (2005) The burgeoning molecular genetics of the Lyme  
411 disease spirochaete. *Nature reviews. Microbiology*, **3**, 129-143.

- 412 13. Drecktrah, D. and Samuels, D.S. (September 17, 2017) Genetic Manipulation of *Borrelia* Spp.  
413 *Current topics in microbiology and immunology*, 10.1007/1082\_2017\_1051.
- 414 14. Xu, H., Raddi, G., Liu, J., Charon, N.W. and Li, C. (2011) Chemoreceptors and flagellar motors are  
415 subterminally located in close proximity at the two cell poles in spirochetes. *Journal of bacteriology*,  
416 **193**, 2652-2656.
- 417 15. Zhang, K., Liu, J., Charon, N.W. and Li, C. (2016) Hypothetical Protein BB0569 Is Essential for  
418 Chemotaxis of the Lyme Disease Spirochete *Borrelia burgdorferi*. *Journal of bacteriology*, **198**, 664-  
419 672.
- 420 16. Li, C., Xu, H., Zhang, K. and Liang, F.T. (2010) Inactivation of a putative flagellar motor switch  
421 protein FliG1 prevents *Borrelia burgdorferi* from swimming in highly viscous media and blocks its  
422 infectivity. *Molecular microbiology*, **75**, 1563-1576.
- 423 17. Schulze, R.J., Chen, S., Kumru, O.S. and Zuckert, W.R. (2010) Translocation of *Borrelia burgdorferi*  
424 surface lipoprotein OspA through the outer membrane requires an unfolded conformation and can  
425 initiate at the C-terminus. *Molecular microbiology*, **76**, 1266-1278.
- 426 18. Schulze, R.J. and Zuckert, W.R. (2006) *Borrelia burgdorferi* lipoproteins are secreted to the outer  
427 surface by default. *Molecular microbiology*, **59**, 1473-1484.
- 428 19. Kumru, O.S., Schulze, R.J., Slusser, J.G. and Zuckert, W.R. (2010) Development and validation of a  
429 FACS-based lipoprotein localization screen in the Lyme disease spirochete *Borrelia burgdorferi*.  
430 *BMC microbiology*, **10**, 277.
- 431 20. Chudakov, D.M., Matz, M.V., Lukyanov, S. and Lukyanov, K.A. (2010) Fluorescent proteins and  
432 their applications in imaging living cells and tissues. *Physiological reviews*, **90**, 1103-1163.
- 433 21. Wennmalm, S. and Simon, S.M. (2007) Studying individual events in biology. *Annual review of*  
434 *biochemistry*, **76**, 419-446.
- 435 22. Yao, Z. and Carballido-Lopez, R. (2014) Fluorescence imaging for bacterial cell biology: from  
436 localization to dynamics, from ensembles to single molecules. *Annual review of microbiology*, **68**,  
437 459-476.
- 438 23. Jacobs, C., Domian, I.J., Maddock, J.R. and Shapiro, L. (1999) Cell cycle-dependent polar  
439 localization of an essential bacterial histidine kinase that controls DNA replication and cell division.  
440 *Cell*, **97**, 111-120.
- 441 24. Gordon, G.S., Sitnikov, D., Webb, C.D., Teleman, A., Straight, A., Losick, R., Murray, A.W. and  
442 Wright, A. (1997) Chromosome and low copy plasmid segregation in *E. coli*: visual evidence for  
443 distinct mechanisms. *Cell*, **90**, 1113-1121.
- 444 25. Arigoni, F., Pogliano, K., Webb, C.D., Stragier, P. and Losick, R. (1995) Localization of protein  
445 implicated in establishment of cell type to sites of asymmetric division. *Science*, **270**, 637-640.
- 446 26. Barbour, A.G. (1984) Isolation and cultivation of Lyme disease spirochetes. *The Yale journal of*  
447 *biology and medicine*, **57**, 521-525.
- 448 27. Zuckert, W.R. (2007) Laboratory maintenance of *Borrelia burgdorferi*. *Current protocols in*  
449 *microbiology*, **Chapter 12**, Unit 12C 11.
- 450 28. Jutras, B.L., Chenail, A.M. and Stevenson, B. (2013) Changes in bacterial growth rate govern  
451 expression of the *Borrelia burgdorferi* OspC and Erp infection-associated surface proteins. *Journal*  
452 *of bacteriology*, **195**, 757-764.
- 453 29. Samuels, D.S. (1995) Electrotransformation of the spirochete *Borrelia burgdorferi*. *Methods in*  
454 *molecular biology*, **47**, 253-259.
- 455 30. Grote, A., Hiller, K., Scheer, M., Munch, R., Nortemann, B., Hempel, D.C. and Jahn, D. (2005) JCat:  
456 a novel tool to adapt codon usage of a target gene to its potential expression host. *Nucleic acids*  
457 *research*, **33**, W526-531.
- 458 31. Nakamura, Y., Gojobori, T. and Ikemura, T. (2000) Codon usage tabulated from international DNA  
459 sequence databases: status for the year 2000. *Nucleic acids research*, **28**, 292.

- 460 32. Glaser, P., Sharpe, M.E., Raether, B., Perego, M., Ohlsen, K. and Errington, J. (1997) Dynamic,  
461 mitotic-like behavior of a bacterial protein required for accurate chromosome partitioning. *Genes &*  
462 *development*, **11**, 1160-1168.
- 463 33. Paintdakhi, A., Parry, B., Campos, M., Irnov, I., Elf, J., Surovtsev, I. and Jacobs-Wagner, C. (2016)  
464 Oufiti: an integrated software package for high-accuracy, high-throughput quantitative microscopy  
465 analysis. *Molecular microbiology*, **99**, 767-777.
- 466 34. Rizzo, M.A., Springer, G.H., Granada, B. and Piston, D.W. (2004) An improved cyan fluorescent  
467 protein variant useful for FRET. *Nature biotechnology*, **22**, 445-449.
- 468 35. Yang, T.T., Cheng, L. and Kain, S.R. (1996) Optimized codon usage and chromophore mutations  
469 provide enhanced sensitivity with the green fluorescent protein. *Nucleic acids research*, **24**, 4592-  
470 4593.
- 471 36. Griesbeck, O., Baird, G.S., Campbell, R.E., Zacharias, D.A. and Tsien, R.Y. (2001) Reducing the  
472 environmental sensitivity of yellow fluorescent protein. Mechanism and applications. *The Journal of*  
473 *biological chemistry*, **276**, 29188-29194.
- 474 37. Pedelacq, J.D., Cabantous, S., Tran, T., Terwilliger, T.C. and Waldo, G.S. (2006) Engineering and  
475 characterization of a superfolder green fluorescent protein. *Nature biotechnology*, **24**, 79-88.
- 476 38. Zacharias, D.A., Violin, J.D., Newton, A.C. and Tsien, R.Y. (2002) Partitioning of lipid-modified  
477 monomeric GFPs into membrane microdomains of live cells. *Science*, **296**, 913-916.
- 478 39. Shaner, N.C., Campbell, R.E., Steinbach, P.A., Giepmans, B.N., Palmer, A.E. and Tsien, R.Y. (2004)  
479 Improved monomeric red, orange and yellow fluorescent proteins derived from *Discosoma* sp. red  
480 fluorescent protein. *Nature biotechnology*, **22**, 1567-1572.
- 481 40. Filonov, G.S., Piatkevich, K.D., Ting, L.M., Zhang, J., Kim, K. and Verkhusha, V.V. (2011) Bright  
482 and stable near-infrared fluorescent protein for in vivo imaging. *Nature biotechnology*, **29**, 757-761.
- 483 41. Rodriguez, E.A., Campbell, R.E., Lin, J.Y., Lin, M.Z., Miyawaki, A., Palmer, A.E., Shu, X., Zhang,  
484 J. and Tsien, R.Y. (2017) The Growing and Glowing Toolbox of Fluorescent and Photoactive  
485 Proteins. *Trends in biochemical sciences*, **42**, 111-129.
- 486 42. Bono, J.L., Elias, A.F., Kupko, J.J., 3rd, Stevenson, B., Tilly, K. and Rosa, P. (2000) Efficient  
487 targeted mutagenesis in *Borrelia burgdorferi*. *Journal of bacteriology*, **182**, 2445-2452.
- 488 43. Dunham-Ems, S.M., Caimano, M.J., Pal, U., Wolgemuth, C.W., Eggers, C.H., Balic, A. and Radolf,  
489 J.D. (2009) Live imaging reveals a biphasic mode of dissemination of *Borrelia burgdorferi* within  
490 ticks. *The Journal of clinical investigation*, **119**, 3652-3665.
- 491 44. Moriarty, T.J., Norman, M.U., Colarusso, P., Bankhead, T., Kubes, P. and Chaconas, G. (2008)  
492 Real-time high resolution 3D imaging of the lyme disease spirochete adhering to and escaping from  
493 the vasculature of a living host. *PLoS pathogens*, **4**, e1000090.
- 494 45. Hyde, J.A., Weening, E.H., Chang, M., Trzeciakowski, J.P., Hook, M., Cirillo, J.D. and Skare, J.T.  
495 (2011) Bioluminescent imaging of *Borrelia burgdorferi* in vivo demonstrates that the fibronectin-  
496 binding protein BBK32 is required for optimal infectivity. *Molecular microbiology*, **82**, 99-113.
- 497 46. Lybarger, S.R., Johnson, T.L., Gray, M.D., Sikora, A.E. and Sandkvist, M. (2009) Docking and  
498 assembly of the type II secretion complex of *Vibrio cholerae*. *Journal of bacteriology*, **191**, 3149-  
499 3161.
- 500 47. Montero Llopis, P., Jackson, A.F., Sliusarenko, O., Surovtsev, I., Heinritz, J., Emonet, T. and  
501 Jacobs-Wagner, C. (2010) Spatial organization of the flow of genetic information in bacteria. *Nature*,  
502 **466**, 77-81.
- 503 48. von Schwedler, U.K., Stuchell, M., Muller, B., Ward, D.M., Chung, H.Y., Morita, E., Wang, H.E.,  
504 Davis, T., He, G.P., Cimbara, D.M. *et al.* (2003) The protein network of HIV budding. *Cell*, **114**,  
505 701-713.
- 506 49. Zamborlini, A., Usami, Y., Radoshitzky, S.R., Popova, E., Palu, G. and Gottlinger, H. (2006)  
507 Release of autoinhibition converts ESCRT-III components into potent inhibitors of HIV-1 budding.  
508 *Proceedings of the National Academy of Sciences of the United States of America*, **103**, 19140-19145.

- 509 50. Goila-Gaur, R., Demirov, D.G., Orenstein, J.M., Ono, A. and Freed, E.O. (2003) Defects in human  
510 immunodeficiency virus budding and endosomal sorting induced by TSG101 overexpression.  
511 *Journal of virology*, **77**, 6507-6519.
- 512 51. Strack, B., Calistri, A., Craig, S., Popova, E. and Gottlinger, H.G. (2003) AIP1/ALIX is a binding  
513 partner for HIV-1 p6 and EIAV p9 functioning in virus budding. *Cell*, **114**, 689-699.
- 514 52. Martin-Serrano, J., Yarovoy, A., Perez-Caballero, D. and Bieniasz, P.D. (2003) Divergent retroviral  
515 late-budding domains recruit vacuolar protein sorting factors by using alternative adaptor proteins.  
516 *Proceedings of the National Academy of Sciences of the United States of America*, **100**, 12414-12419.
- 517 53. Lin, Y., Kimpler, L.A., Naismith, T.V., Lauer, J.M. and Hanson, P.I. (2005) Interaction of the  
518 mammalian endosomal sorting complex required for transport (ESCRT) III protein hSnf7-1 with  
519 itself, membranes, and the AAA+ ATPase SKD1. *The Journal of biological chemistry*, **280**, 12799-  
520 12809.
- 521 54. Howard, T.L., Stauffer, D.R., Degnin, C.R. and Hollenberg, S.M. (2001) CHMP1 functions as a  
522 member of a newly defined family of vesicle trafficking proteins. *Journal of cell science*, **114**, 2395-  
523 2404.
- 524 55. Broder, D.H. and Pogliano, K. (2006) Forespore engulfment mediated by a ratchet-like mechanism.  
525 *Cell*, **126**, 917-928.
- 526 56. Gregory, J.A., Becker, E.C. and Pogliano, K. (2008) Bacillus subtilis MinC destabilizes FtsZ-rings at  
527 new cell poles and contributes to the timing of cell division. *Genes & development*, **22**, 3475-3488.
- 528 57. Jouvenet, N., Simon, S.M. and Bieniasz, P.D. (2009) Imaging the interaction of HIV-1 genomes and  
529 Gag during assembly of individual viral particles. *Proceedings of the National Academy of Sciences  
530 of the United States of America*, **106**, 19114-19119.
- 531 58. Jouvenet, N., Zhadina, M., Bieniasz, P.D. and Simon, S.M. (2011) Dynamics of ESCRT protein  
532 recruitment during retroviral assembly. *Nature cell biology*, **13**, 394-401.
- 533 59. Bleck, M., Itano, M.S., Johnson, D.S., Thomas, V.K., North, A.J., Bieniasz, P.D. and Simon, S.M.  
534 (2014) Temporal and spatial organization of ESCRT protein recruitment during HIV-1 budding.  
535 *Proceedings of the National Academy of Sciences of the United States of America*, **111**, 12211-12216.
- 536 60. Itano, M.S., Bleck, M., Johnson, D.S. and Simon, S.M. (2016) Readily Accessible Multiplane  
537 Microscopy: 3D Tracking the HIV-1 Genome in Living Cells. *Traffic*, **17**, 179-186.
- 538 61. Arnold, W.K., Savage, C.R., Brissette, C.A., Seshu, J., Livny, J. and Stevenson, B. (2016) RNA-Seq  
539 of *Borrelia burgdorferi* in Multiple Phases of Growth Reveals Insights into the Dynamics of Gene  
540 Expression, Transcriptome Architecture, and Noncoding RNAs. *PloS one*, **11**, e0164165.
- 541 62. Adams, P.P., Flores Avile, C., Popitsch, N., Bilusic, I., Schroeder, R., Lybecker, M. and Jewett,  
542 M.W. (2017) In vivo expression technology and 5' end mapping of the *Borrelia burgdorferi*  
543 transcriptome identify novel RNAs expressed during mammalian infection. *Nucleic acids research*,  
544 **45**, 775-792.
- 545 63. Frank, K.L., Bundle, S.F., Kresge, M.E., Eggers, C.H. and Samuels, D.S. (2003) aadA confers  
546 streptomycin resistance in *Borrelia burgdorferi*. *Journal of bacteriology*, **185**, 6723-6727.
- 547 64. Elias, A.F., Bono, J.L., Kupko, J.J., 3rd, Stewart, P.E., Krum, J.G. and Rosa, P.A. (2003) New  
548 antibiotic resistance cassettes suitable for genetic studies in *Borrelia burgdorferi*. *Journal of  
549 molecular microbiology and biotechnology*, **6**, 29-40.
- 550 65. Sartakova, M., Dobrikova, E. and Cabello, F.C. (2000) Development of an extrachromosomal  
551 cloning vector system for use in *Borrelia burgdorferi*. *Proceedings of the National Academy of  
552 Sciences of the United States of America*, **97**, 4850-4855.
- 553 66. Kimura, M., Kamakura, T., Tao, Q.Z., Kaneko, I. and Yamaguchi, I. (1994) Cloning of the  
554 blasticidin S deaminase gene (BSD) from *Aspergillus terreus* and its use as a selectable marker for  
555 *Schizosaccharomyces pombe* and *Pyricularia oryzae*. *Molecular & general genetics : MGG*, **242**,  
556 121-129.



- 557 67. Gritz, L. and Davies, J. (1983) Plasmid-encoded hygromycin B resistance: the sequence of  
558 hygromycin B phosphotransferase gene and its expression in *Escherichia coli* and *Saccharomyces*  
559 *cerevisiae*. *Gene*, **25**, 179-188.
- 560 68. Rao, R.N., Allen, N.E., Hobbs, J.N., Jr., Alborn, W.E., Jr., Kirst, H.A. and Paschal, J.W. (1983)  
561 Genetic and enzymatic basis of hygromycin B resistance in *Escherichia coli*. *Antimicrobial agents*  
562 *and chemotherapy*, **24**, 689-695.
- 563 69. Thanbichler, M., Iniesta, A.A. and Shapiro, L. (2007) A comprehensive set of plasmids for vanillate-  
564 and xylose-inducible gene expression in *Caulobacter crescentus*. *Nucleic acids research*, **35**, e137.
- 565 70. Qin, A., Tucker, A.M., Hines, A. and Wood, D.O. (2004) Transposon mutagenesis of the obligate  
566 intracellular pathogen *Rickettsia prowazekii*. *Applied and environmental microbiology*, **70**, 2816-  
567 2822.
- 568 71. Tribuddharat, C. and Fennewald, M. (1999) Integron-mediated rifampin resistance in *Pseudomonas*  
569 *aeruginosa*. *Antimicrobial agents and chemotherapy*, **43**, 960-962.
- 570 72. Johnson, S.E., Klein, G.C., Schmid, G.P. and Feeley, J.C. (1984) Susceptibility of the Lyme disease  
571 spirochete to seven antimicrobial agents. *The Yale journal of biology and medicine*, **57**, 549-553.
- 572 73. Alekshun, M., Kashlev, M. and Schwartz, I. (1997) Molecular cloning and characterization of  
573 *Borrelia burgdorferi* rpoB. *Gene*, **186**, 227-235.
- 574 74. Chan, K., Alter, L., Barthold, S.W. and Parveen, N. (2015) Disruption of bbe02 by Insertion of a  
575 Luciferase Gene Increases Transformation Efficiency of *Borrelia burgdorferi* and Allows Live  
576 Imaging in Lyme Disease Susceptible C3H Mice. *PLoS one*, **10**, e0129532.
- 577 75. Rego, R.O., Bestor, A. and Rosa, P.A. (2011) Defining the plasmid-borne restriction-modification  
578 systems of the Lyme disease spirochete *Borrelia burgdorferi*. *Journal of bacteriology*, **193**, 1161-  
579 1171.
- 580 76. Kawabata, H., Norris, S.J. and Watanabe, H. (2004) BBE02 disruption mutants of *Borrelia*  
581 *burgdorferi* B31 have a highly transformable, infectious phenotype. *Infection and immunity*, **72**,  
582 7147-7154.
- 583 77. Lawrenz, M.B., Kawabata, H., Purser, J.E. and Norris, S.J. (2002) Decreased electroporation  
584 efficiency in *Borrelia burgdorferi* containing linear plasmids lp25 and lp56: impact on  
585 transformation of infectious *B. burgdorferi*. *Infection and immunity*, **70**, 4798-4804.
- 586 78. Purser, J.E. and Norris, S.J. (2000) Correlation between plasmid content and infectivity in *Borrelia*  
587 *burgdorferi*. *Proceedings of the National Academy of Sciences of the United States of America*, **97**,  
588 13865-13870.
- 589 79. Labandeira-Rey, M. and Skare, J.T. (2001) Decreased infectivity in *Borrelia burgdorferi* strain B31  
590 is associated with loss of linear plasmid 25 or 28-1. *Infection and immunity*, **69**, 446-455.
- 591 80. Landgraf, D., Okumus, B., Chien, P., Baker, T.A. and Paulsson, J. (2012) Segregation of molecules  
592 at cell division reveals native protein localization. *Nature methods*, **9**, 480-482.
- 593 81. Wang, S., Moffitt, J.R., Dempsey, G.T., Xie, X.S. and Zhuang, X. (2014) Characterization and  
594 development of photoactivatable fluorescent proteins for single-molecule-based superresolution  
595 imaging. *Proceedings of the National Academy of Sciences of the United States of America*, **111**,  
596 8452-8457.
- 597 82. Dinh, T. and Bernhardt, T.G. (2011) Using superfolder green fluorescent protein for periplasmic  
598 protein localization studies. *Journal of bacteriology*, **193**, 4984-4987.
- 599 83. Dowdell, A.S., Murphy, M.D., Azodi, C., Swanson, S.K., Florens, L., Chen, S. and Zuckert, W.R.  
600 (2017) Comprehensive Spatial Analysis of the *Borrelia burgdorferi* Lipoproteome Reveals a  
601 Compartmentalization Bias toward the Bacterial Surface. *Journal of bacteriology*, **199**, e00658-  
602 00616.
- 603 84. Weissleder, R. and Ntziachristos, V. (2003) Shedding light onto live molecular targets. *Nature*  
604 *medicine*, **9**, 123-128.

- 605 85. Jobsis, F.F. (1977) Noninvasive, infrared monitoring of cerebral and myocardial oxygen sufficiency  
606 and circulatory parameters. *Science*, **198**, 1264-1267.
- 607 86. Gafvels, M., Holmstrom, P., Somell, A., Sjovall, F., Svensson, J.O., Stahle, L., Broome, U. and Stal,  
608 P. (2009) A novel mutation in the biliverdin reductase-A gene combined with liver cirrhosis results  
609 in hyperbiliriverdinaemia (green jaundice). *Liver international : official journal of the International*  
610 *Association for the Study of the Liver*, **29**, 1116-1124.
- 611 87. Bonazzi, D., Lo Schiavo, V., Machata, S., Djafer-Cherif, I., Nivoit, P., Manriquez, V., Tanimoto, H.,  
612 Husson, J., Henry, N., Chate, H. *et al.* (May 15, 2018) Intermittent Pili-Mediated Forces Fluidize  
613 Neisseria meningitidis Aggregates Promoting Vascular Colonization. *Cell*,  
614 10.1016/j.cell.2018.1004.1010.
- 615 88. Alverson, J., Bundle, S.F., Sohaskey, C.D., Lybecker, M.C. and Samuels, D.S. (2003)  
616 Transcriptional regulation of the ospAB and ospC promoters from *Borrelia burgdorferi*. *Molecular*  
617 *microbiology*, **48**, 1665-1677.
- 618 89. Alverson, J. and Samuels, D.S. (2002) groEL expression in gyrB mutants of *Borrelia burgdorferi*.  
619 *Journal of bacteriology*, **184**, 6069-6072.
- 620 90. Elias, A.F., Stewart, P.E., Grimm, D., Caimano, M.J., Eggers, C.H., Tilly, K., Bono, J.L., Akins,  
621 D.R., Radolf, J.D., Schwan, T.G. *et al.* (2002) Clonal polymorphism of *Borrelia burgdorferi* strain  
622 B31 MI: implications for mutagenesis in an infectious strain background. *Infection and immunity*, **70**,  
623 2139-2150.
- 624 91. Casjens, S., van Vugt, R., Tilly, K., Rosa, P.A. and Stevenson, B. (1997) Homology throughout the  
625 multiple 32-kilobase circular plasmids present in Lyme disease spirochetes. *Journal of bacteriology*,  
626 **179**, 217-227.
- 627 92. Babb, K., McAlister, J.D., Miller, J.C. and Stevenson, B. (2004) Molecular characterization of  
628 *Borrelia burgdorferi* erp promoter/operator elements. *Journal of bacteriology*, **186**, 2745-2756.
- 629 93. Stewart, P.E., Thalken, R., Bono, J.L. and Rosa, P. (2001) Isolation of a circular plasmid region  
630 sufficient for autonomous replication and transformation of infectious *Borrelia burgdorferi*.  
631 *Molecular microbiology*, **39**, 714-721.
- 632 94. Miller, W.G., Bates, A.H., Horn, S.T., Brandl, M.T., Wachtel, M.R. and Mandrell, R.E. (2000)  
633 Detection on surfaces and in Caco-2 cells of *Campylobacter jejuni* cells transformed with new gfp,  
634 yfp, and cfp marker plasmids. *Applied and environmental microbiology*, **66**, 5426-5436.
- 635 95. Eggers, C.H., Caimano, M.J., Clawson, M.L., Miller, W.G., Samuels, D.S. and Radolf, J.D. (2002)  
636 Identification of loci critical for replication and compatibility of a *Borrelia burgdorferi* cp32 plasmid  
637 and use of a cp32-based shuttle vector for the expression of fluorescent reporters in the lyme disease  
638 spirochaete. *Molecular microbiology*, **43**, 281-295.
- 639 96. Cormack, B.P., Valdivia, R.H. and Falkow, S. (1996) FACS-optimized mutants of the green  
640 fluorescent protein (GFP). *Gene*, **173**, 33-38.
- 641 97. Miller, W.G., Leveau, J.H. and Lindow, S.E. (2000) Improved gfp and inaZ broad-host-range  
642 promoter-probe vectors. *Molecular plant-microbe interactions : MPMI*, **13**, 1243-1250.
- 643 98. Miller, W.G. and Lindow, S.E. (1997) An improved GFP cloning cassette designed for prokaryotic  
644 transcriptional fusions. *Gene*, **191**, 149-153.
- 645 99. Cramer, A., Whitehorn, E.A., Tate, E. and Stemmer, W.P. (1996) Improved green fluorescent  
646 protein by molecular evolution using DNA shuffling. *Nature biotechnology*, **14**, 315-319.
- 647 100. Carroll, J.A., Stewart, P.E., Rosa, P., Elias, A.F. and Garon, C.F. (2003) An enhanced GFP  
648 reporter system to monitor gene expression in *Borrelia burgdorferi*. *Microbiology*, **149**, 1819-1828.
- 649 101. Campbell, R.E., Tour, O., Palmer, A.E., Steinbach, P.A., Baird, G.S., Zacharias, D.A. and Tsien,  
650 R.Y. (2002) A monomeric red fluorescent protein. *Proceedings of the National Academy of Sciences*  
651 *of the United States of America*, **99**, 7877-7882.

- 652 102. Lee, W.Y., Moriarty, T.J., Wong, C.H., Zhou, H., Strieter, R.M., van Rooijen, N., Chaconas, G.  
653 and Kubes, P. (2010) An intravascular immune response to *Borrelia burgdorferi* involves Kupffer  
654 cells and iNKT cells. *Nature immunology*, **11**, 295-302.
- 655 103. Sartakova, M.L., Dobrikova, E.Y., Terekhova, D.A., Devis, R., Bugrysheva, J.V., Morozova,  
656 O.V., Godfrey, H.P. and Cabello, F.C. (2003) Novel antibiotic-resistance markers in pGK12-derived  
657 vectors for *Borrelia burgdorferi*. *Gene*, **303**, 131-137.
- 658 104. Terekhova, D., Sartakova, M.L., Wormser, G.P., Schwartz, I. and Cabello, F.C. (2002)  
659 Erythromycin resistance in *Borrelia burgdorferi*. *Antimicrobial agents and chemotherapy*, **46**, 3637-  
660 3640.

661

## 662 FIGURES LEGENDS

663 **Figure 1.** Fluorescent protein characterization. **A.** *B. burgdorferi* strains CJW\_Bb090 through  
664 CJW\_Bb096 expressing the indicated fluorescent proteins were imaged with matching filter sets. **B.**  
665 Strain CJW\_Bb100 expressing iRFP requires biliverdin for development of fluorescence. Cells were  
666 grown in liquid culture with biliverdin for two days prior to imaging using a Cy5.5 filter set. **C.** Dose-  
667 response of iRFP fluorescence to biliverdin concentration. Strain CJW\_Bb100 was grown in the  
668 presence of biliverdin for two days prior to imaging. Between 86 and 206 cells were analysed for each  
669 concentration. Total cellular fluorescence levels were normalized by the cell area. Shown are means  $\pm$   
670 standard deviations (SD). A.U., arbitrary units. **D.** Time-course of iRFP fluorescence development in  
671 strain CJW\_Bb100 following addition of 16  $\mu$ M biliverdin. Between 68 and 110 cells were analysed for  
672 each time point. **E.** Biliverdin does not affect *B. burgdorferi* growth. Strain CJW\_Bb100 was inoculated  
673 at  $10^4$  cells/mL in duplicate in medium containing 4  $\mu$ M biliverdin or no biliverdin, after which the  
674 spirochetes were enumerated daily.

675 **Figure 2.** Quantification of fluorescent protein signal using common fluorescence filter sets. Strains  
676 CJW\_Bb090 through CJW\_Bb096 and CJW\_Bb100 expressing the fluorescent proteins indicated at the  
677 bottom of the figure were each imaged using five filter sets: CFP, GFP, YFP, mCherry/TexasRed, and  
678 Cy5.5 (see the Materials and Methods section for filter set specifications). Strain CJW\_Bb073 carrying  
679 an empty shuttle vector (EV) was also imaged to measure the cellular autofluorescence. Each filter set is  
680 listed at the top of the corresponding graph. Fluorescence intensity values were normalized by the cell  
681 area and are depicted as means  $\pm$  SD in arbitrary units (A.U.). For each strain, 117 to 308 cells were  
682 analysed. The iRFP strain was grown in the presence of 4  $\mu$ M biliverdin for three days prior to imaging.  
683 Coloured background highlights the data obtained with filter sets that were ideal for the expressed  
684 fluorescent protein.

685 **Figure 3.** Promoter strength quantification. **A.** mRNA expression levels extracted from published RNA-  
686 seq data obtained using strain B31-A3 (90) grown to early exponential phase ( $10^6$  cells/mL), mid-  
687 exponential phase ( $10^7$  cells/mL), or stationary phase (one day after reaching  $10^8$  cells/mL) (61). FPKM,  
688 fragments per kilobase transcript per million mapped reads. **B.** Promoter reporter plasmid map (not  
689 drawn to scale). IR, inverted repeats; cp9 *ori*, origin or replication of *B. burgdorferi* plasmid cp9, which  
690 includes the genes *orf1*, *orf2*, *orf3* needed for plasmid replication in *B. burgdorferi*; colE1 *ori*, *E. coli*  
691 origin of replication; P<sub>flgB</sub>, *B. burgdorferi* flagellar rod operon promoter; *aphI*, kanamycin resistance  
692 gene. The promoter (blue) and the mCherry-coding sequence (red) are connected by a BamHI restriction  
693 enzyme site and a ribosomal binding site (RBS). The native locus from which the promoter was  
694 extracted is depicted below the plasmid map. The BamHI-RBS-mCherry sequence effectively replaced  
695 the gene's protein coding sequence shown in pink. Translational START sites are marked by the ATG  
696 codon. **C.** Promoter strength quantified by measuring cellular mCherry fluorescence in strains  
697 CJW\_Bb069, CJW\_Bb108 through CJW\_Bb112, and CJW\_Bb146. The fluorescence levels were  
698 normalized by the cell area. The promoters were ranked in increasing order of the mean fluorescence  
699 values and are listed below the graph. Shown are means  $\pm$  SD. Between 97 and 160 cells were analysed  
700 per strain. EV, empty vector; A.U., arbitrary units.

701 **Figure 4.** Characterization of blasticidin S and hygromycin B resistances in *B. burgdorferi*. **A.** Maps of  
702 shuttle vectors pBSV2B and pBSV2H. IR, inverted repeats; cp9 *ori*, origin or replication of *B.*  
703 *burgdorferi* plasmid cp9; colE1 *ori*, *E. coli* origin of replication; MCS, multicloning site; *arr-2*,  
704 rifampicin resistance gene for selection in *E. coli*; P<sub>flgB</sub>, *B. burgdorferi* flagellar rod operon promoter;  
705 *bsd<sup>Bb</sup>*, *B. burgdorferi* codon-optimised blasticidin S deaminase-encoding gene; *hph<sup>Bb</sup>*, *B. burgdorferi*  
706 codon-optimised hygromycin B phosphotransferase-encoding gene. The maps are not drawn to scale. **B.**  
707 Plate map showing the final antibiotic concentrations used for cross-resistance testing. Each  
708 concentration was tested in two adjacent wells. Concentrations routinely used for selection are indicated  
709 by the arrow. **C.** Schematic representation of colour change of the growth medium from red (absence of  
710 spirochete growth) to orange/yellow (presence of spirochete growth). A line marks the boundary  
711 between growth and no growth in an antibiotic concentration series. The lowest antibiotic concentration  
712 that blocked growth was identified as the minimal inhibitory concentration (MIC). **D.-H.** Susceptibility  
713 test of each resistance-carrying strain to various antibiotic concentrations according to the plate layout  
714 shown in B. The plates were incubated to allow for growth-dependent acidification of the medium and  
715 change in phenol red pH indicator colour from red to orange and yellow, as depicted in panel C. Images

716 were obtained using colourimetric imaging of the individual plates. MIC boundaries are marked by dark  
717 lines. The strains used are listed above each image.

718

719 TABLES

**Table 1. Strains used in this study**

| Strain                                | Genotype / description                                                                                                                                                                                                                                                                                 | Antibiotic resistance           | Source or reference |
|---------------------------------------|--------------------------------------------------------------------------------------------------------------------------------------------------------------------------------------------------------------------------------------------------------------------------------------------------------|---------------------------------|---------------------|
| <b><i>E. coli</i> cloning strains</b> |                                                                                                                                                                                                                                                                                                        |                                 |                     |
| DH5 $\alpha$                          | F <sup>-</sup> $\Phi$ 80 <i>dlacZ</i> $\Delta$ <i>M15</i> $\Delta$ ( <i>lacZYA-argF</i> ) U169 <i>deoR</i> <i>recA1</i> <i>endA1</i> <i>hsdR17</i> ( <i>r<sub>k</sub><sup>-</sup></i> , <i>m<sub>k</sub><sup>+</sup></i> ) <i>phoA</i> <i>supE44</i> $\lambda$ <i>thi-1</i> <i>gyrA96</i> <i>relA1</i> | None                            | Promega             |
| XL10-Gold                             | Tet <sup>r</sup> $\Delta$ ( <i>mcrA</i> )183 $\Delta$ ( <i>mcrCB-hsdSMR-mrr</i> )173 <i>endA1</i> <i>supE44</i> <i>thi-1</i> <i>recA1</i> <i>gyrA96</i> <i>relA1</i> <i>lac</i> Hte [F' <i>proAB lacI<sup>q</sup>Z</i> $\Delta$ <i>M15</i> Tn10 (Tet <sup>r</sup> ) Amy Cam <sup>r</sup> ]             | Tetracycline<br>Chloramphenicol | Agilent             |
| <b><i>B. burgdorferi</i> strains</b>  |                                                                                                                                                                                                                                                                                                        |                                 |                     |
| B31 MI                                | Low-passage derivative of the type strain B31                                                                                                                                                                                                                                                          | None                            | (9)                 |
| B31 e2                                | Reduced genome non-infectious clone of strain B31                                                                                                                                                                                                                                                      | None                            | (91)                |
| CJW_Bb069                             | B31 e2 / pBSV2_2                                                                                                                                                                                                                                                                                       | Kanamycin                       | This study          |
| CJW_Bb070                             | B31 e2 / pKFSS1_2                                                                                                                                                                                                                                                                                      | Streptomycin                    | This study          |
| CJW_Bb071                             | B31 e2 / pBSV2H                                                                                                                                                                                                                                                                                        | Hygromycin B                    | This study          |
| CJW_Bb072                             | B31 e2 / pBSV2B                                                                                                                                                                                                                                                                                        | Blasticidin S                   | This study          |
| CJW_Bb073                             | B31 e2 / pBSV2G_2                                                                                                                                                                                                                                                                                      | Gentamicin                      | This study          |
| CJW_Bb090                             | B31 e2 / pBSV2G_P <sub>flaB</sub> -msfGFP <sup>Bb</sup>                                                                                                                                                                                                                                                | Gentamicin                      | This study          |
| CJW_Bb091                             | B31 e2 / pBSV2G_P <sub>flaB</sub> -msfCFP <sup>Bb</sup>                                                                                                                                                                                                                                                | Gentamicin                      | This study          |
| CJW_Bb092                             | B31 e2 / pBSV2G_P <sub>flaB</sub> -msfYFP <sup>Bb</sup>                                                                                                                                                                                                                                                | Gentamicin                      | This study          |
| CJW_Bb093                             | B31 e2 / pBSV2G_P <sub>flaB</sub> -mCherry <sup>Bb</sup>                                                                                                                                                                                                                                               | Gentamicin                      | This study          |
| CJW_Bb094                             | B31 e2 / pBSV2G_P <sub>flaB</sub> -mEGFP <sup>Bb</sup>                                                                                                                                                                                                                                                 | Gentamicin                      | This study          |
| CJW_Bb095                             | B31 e2 / pBSV2G_P <sub>flaB</sub> -mCerulean <sup>Bb</sup>                                                                                                                                                                                                                                             | Gentamicin                      | This study          |
| CJW_Bb096                             | B31 e2 / pBSV2G_P <sub>flaB</sub> -mCitrine <sup>Bb</sup>                                                                                                                                                                                                                                              | Gentamicin                      | This study          |
| CJW_Bb100                             | B31 e2 / pBSV2G_P <sub>flaB</sub> -iRFP <sup>Bb</sup>                                                                                                                                                                                                                                                  | Gentamicin                      | This study          |
| CJW_Bb108                             | B31 e2 / pBSV2_P <sub>resT</sub> -mCherry <sup>Bb</sup>                                                                                                                                                                                                                                                | Kanamycin                       | This study          |
| CJW_Bb109                             | B31 e2 / pBSV2_P <sub>0026</sub> -mCherry <sup>Bb</sup>                                                                                                                                                                                                                                                | Kanamycin                       | This study          |
| CJW_Bb110                             | B31 e2 / pBSV2_P <sub>0031</sub> -mCherry <sup>Bb</sup>                                                                                                                                                                                                                                                | Kanamycin                       | This study          |
| CJW_Bb111                             | B31 e2 / pBSV2_P <sub>0526</sub> -mCherry <sup>Bb</sup>                                                                                                                                                                                                                                                | Kanamycin                       | This study          |
| CJW_Bb112                             | B31 e2 / pBSV2_P <sub>0826</sub> -mCherry <sup>Bb</sup>                                                                                                                                                                                                                                                | Kanamycin                       | This study          |
| CJW_Bb146                             | B31 e2 / pBSV2_P <sub>flaB</sub> -mCherry <sup>Bb</sup>                                                                                                                                                                                                                                                | Kanamycin                       | This study          |

720

721

722

723

724

**Table 2. Plasmids used in this study.**

| Plasmid name                                      | Description                                                                                                                           | Antibiotic resistance       | Reference  |
|---------------------------------------------------|---------------------------------------------------------------------------------------------------------------------------------------|-----------------------------|------------|
| pBSV2G                                            | Gentamicin-resistant <i>B. burgdorferi</i> shuttle vector                                                                             | Gentamicin                  | (64)       |
| pBLS599                                           | pBSV2-derived <i>B. burgdorferi</i> shuttle vector lacking the zeocin gene; expresses <i>gfpmut3</i>                                  | Kanamycin                   | (92)       |
| pKFSS1                                            | Streptomycin-resistant <i>B. burgdorferi</i> shuttle vector                                                                           | Streptomycin                | (63)       |
| pMCS-3                                            | Plasmid carrying the rifampicin resistance gene <i>arr-2</i>                                                                          | Rifampicin                  | (69)       |
| pSL1180                                           | Ampicillin-resistant cloning plasmid                                                                                                  | Ampicillin                  | Amersham   |
| pBSV2G_2                                          | Modified gentamicin-resistant <i>B. burgdorferi</i> shuttle vector; has extended multicloning site                                    | Gentamicin                  | This study |
| pBSV2_2                                           | Kanamycin-resistant <i>B. burgdorferi</i> shuttle vector similar to pBSV2 (93); lacks the zeocin gene; has extended multicloning site | Kanamycin                   | This study |
| pKFSS1_2                                          | Modified streptomycin-resistant <i>B. burgdorferi</i> shuttle vector; has extended multicloning site                                  | Streptomycin                | This study |
| pBSV2B                                            | Blasticidin S-resistant <i>B. burgdorferi</i> shuttle vector; uses rifampicin for selection in <i>E. coli</i>                         | Blasticidin S<br>Rifampicin | This study |
| pBSV2H                                            | Hygromycin B-resistant <i>B. burgdorferi</i> shuttle vector; uses rifampicin for selection in <i>E. coli</i>                          | Hygromycin B<br>Rifampicin  | This study |
| pBSV2G_P <sub>flaB</sub> -mCherry <sup>Bb</sup>   | For expression of mCherry <sup>Bb</sup> under the control of the strong <i>B. burgdorferi</i> promoter P <sub>flaB</sub>              | Gentamicin                  | This study |
| pBSV2G_P <sub>flaB</sub> -msfGFP <sup>Bb</sup>    | For expression of msfGFP <sup>Bb</sup> under the control of the strong <i>B. burgdorferi</i> promoter P <sub>flaB</sub>               | Gentamicin                  | This study |
| pBSV2G_P <sub>flaB</sub> -msfCFP <sup>Bb</sup>    | For expression of msfCFP <sup>Bb</sup> under the control of the strong <i>B. burgdorferi</i> promoter P <sub>flaB</sub>               | Gentamicin                  | This study |
| pBSV2G_P <sub>flaB</sub> -msfYFP <sup>Bb</sup>    | For expression of msfYFP <sup>Bb</sup> under the control of the strong <i>B. burgdorferi</i> promoter P <sub>flaB</sub>               | Gentamicin                  | This study |
| pBSV2G_P <sub>flaB</sub> -mEGFP <sup>Bb</sup>     | For expression of mEGFP <sup>Bb</sup> under the control of the strong <i>B. burgdorferi</i> promoter P <sub>flaB</sub>                | Gentamicin                  | This study |
| pBSV2G_P <sub>flaB</sub> -mCerulean <sup>Bb</sup> | For expression of mCerulean <sup>Bb</sup> under the control of the strong <i>B. burgdorferi</i> promoter P <sub>flaB</sub>            | Gentamicin                  | This study |
| pBSV2G_P <sub>flaB</sub> -mCitrine <sup>Bb</sup>  | For expression of mCitrine <sup>Bb</sup> under the control of the strong <i>B. burgdorferi</i> promoter P <sub>flaB</sub>             | Gentamicin                  | This study |
| pBSV2G_P <sub>flaB</sub> -iRFP <sup>Bb</sup>      | For expression of iRFP <sup>Bb</sup> under the control of the strong <i>B. burgdorferi</i> promoter P <sub>flaB</sub>                 | Gentamicin                  | This study |
| pBSV2_P <sub>resT</sub> -mCherry <sup>Bb</sup>    | For expression of mCherry <sup>Bb</sup> under the control of the <i>B. burgdorferi</i> promoter P <sub>resT</sub>                     | Kanamycin                   | This study |
| pBSV2_P <sub>0026</sub> -mCherry <sup>Bb</sup>    | For expression of mCherry <sup>Bb</sup> under the control of the <i>B. burgdorferi</i> promoter P <sub>0026</sub>                     | Kanamycin                   | This study |
| pBSV2_P <sub>0031</sub> -mCherry <sup>Bb</sup>    | For expression of mCherry <sup>Bb</sup> under the control of the <i>B. burgdorferi</i> promoter P <sub>0031</sub>                     | Kanamycin                   | This study |
| pBSV2_P <sub>0526</sub> -mCherry <sup>Bb</sup>    | For expression of mCherry <sup>Bb</sup> under the control of the <i>B. burgdorferi</i> promoter P <sub>0526</sub>                     | Kanamycin                   | This study |
| pBSV2_P <sub>0826</sub> -mCherry <sup>Bb</sup>    | For expression of mCherry <sup>Bb</sup> under the control of the <i>B. burgdorferi</i> promoter P <sub>0826</sub>                     | Kanamycin                   | This study |
| pBSV2_P <sub>flaB</sub> -mCherry <sup>Bb</sup>    | For expression of mCherry <sup>Bb</sup> under the control of the strong <i>B. burgdorferi</i> promoter P <sub>flaB</sub>              | Kanamycin                   | This study |

**Table 3. Fluorescent proteins used in *B. burgdorferi***

| Colour class                                                                  | Protein expressed | Ex/Em <sup>a</sup> max (nm) | Source or reference for protein/gene development | Reference for use in <i>B. burgdorferi</i> | Notes                                                               |
|-------------------------------------------------------------------------------|-------------------|-----------------------------|--------------------------------------------------|--------------------------------------------|---------------------------------------------------------------------|
| <b>I. Fluorescent proteins previously used in <i>B. burgdorferi</i>:</b>      |                   |                             |                                                  |                                            |                                                                     |
| Cyan                                                                          | CFP               | 434/477 <sup>b</sup>        | Clontech; (94)                                   | (95)                                       | Rarely used                                                         |
| Green                                                                         | EGFP              | 489/509                     | Clontech; (35)                                   | (65)                                       | Low expression; has mammalian codon usage                           |
|                                                                               | GFPmut1           | 488/507                     | (94,96-98)                                       | (95)                                       | Widely used; adapted for bacterial expression; same protein as EGFP |
|                                                                               | GFPmut3           | 501/511                     | (96)                                             | (92)                                       |                                                                     |
|                                                                               | GFP cycle 3       | NR <sup>c</sup>             | (99)                                             | (100)                                      | Retains UV excitation peak                                          |
| Yellow                                                                        | YFP               | 514/527 <sup>b</sup>        | (94)                                             | (95)                                       | Rarely used                                                         |
| Red                                                                           | mRFP1             | 584/607                     | (101)                                            | (18)                                       | Folds in the periplasm                                              |
|                                                                               | dTomato           | 554/581                     | (39)                                             | (102)                                      | Dimeric                                                             |
| <b>II. New fluorescent proteins adapted for use in <i>B. burgdorferi</i>:</b> |                   |                             |                                                  |                                            |                                                                     |
| Cyan                                                                          | mCerulean         | 433/475                     | (34)                                             | This study                                 | A206K monomeric mutation                                            |
|                                                                               | msfCFP            | NR <sup>c</sup>             | (37)                                             | This study                                 | A206K mutation; superfolder                                         |
| Green                                                                         | mEGFP             | 489/509                     | (35)                                             | This study                                 | A206K mutation                                                      |
|                                                                               | msfGFP            | 485/NR <sup>c</sup>         | (37)                                             | This study                                 | A206K mutation; superfolder                                         |
| Yellow                                                                        | mCitrine          | 516/529                     | (36)                                             | This study                                 | A206K mutation                                                      |
|                                                                               | msfYFP            | NR <sup>c</sup>             | (37)                                             | This study                                 | A206K mutation; superfolder                                         |
| Red                                                                           | mCherry           | 587/610                     | (39)                                             | This study                                 |                                                                     |
| Infrared                                                                      | iRFP              | 690/713                     | (40)                                             | This study                                 | Dimeric                                                             |

<sup>a</sup> Maximum excitation (Ex) and emission (Em) wavelengths; <sup>b</sup> values assumed to be those for ECFP and EYFP, respectively (20); <sup>c</sup>NR, not reported: values were not reported in the original publication, or could not be exactly inferred from excitation and emission graphs.

725

726

727

728

729

730



**Table 4. Summary of antibiotic resistance markers used in *B. burgdorferi*<sup>a</sup>**

| Resistance gene                               | Antibiotic    | MIC <sup>b</sup> (µg/mL) | Notes                                                                               | References   |
|-----------------------------------------------|---------------|--------------------------|-------------------------------------------------------------------------------------|--------------|
| <b>I. Widely used resistance markers</b>      |               |                          |                                                                                     |              |
| <i>aphI</i>                                   | Kanamycin     | <25                      | Cross-resistance to neomycin, lividomycin, paromomycin, ribostamycin                | (42,64)      |
| <i>aadA</i>                                   | Streptomycin  | 7 <sup>c</sup>           | Expected cross-resistance to spectinomycin                                          | (63)         |
| <i>aacC1</i>                                  | Gentamicin    | <15.6                    |                                                                                     | (64)         |
| <i>ermC</i>                                   | Erythromycin  | 0.005                    | Resistance level varies among strains; May pose safety risk                         | (65,103,104) |
| <b>II. Newly developed resistance markers</b> |               |                          |                                                                                     |              |
| <i>bsd<sup>Bb</sup></i>                       | Blasticidin S | <5                       | Neither marker provides cross-resistance to the selection antibiotics listed above. | This study   |
| <i>hph<sup>Bb</sup></i>                       | Hygromycin B  | <200                     |                                                                                     | This study   |

<sup>a</sup>For space considerations, this table does not contain a comprehensive list of antibiotic resistance markers developed for use in *B. burgdorferi*. For a detailed discussion of other markers, please see (13); <sup>b</sup>Minimal inhibitory concentration, determined in liquid culture; <sup>c</sup>Value is that of an inhibitory dose 50, or ID<sub>50</sub>.

**Figure 1**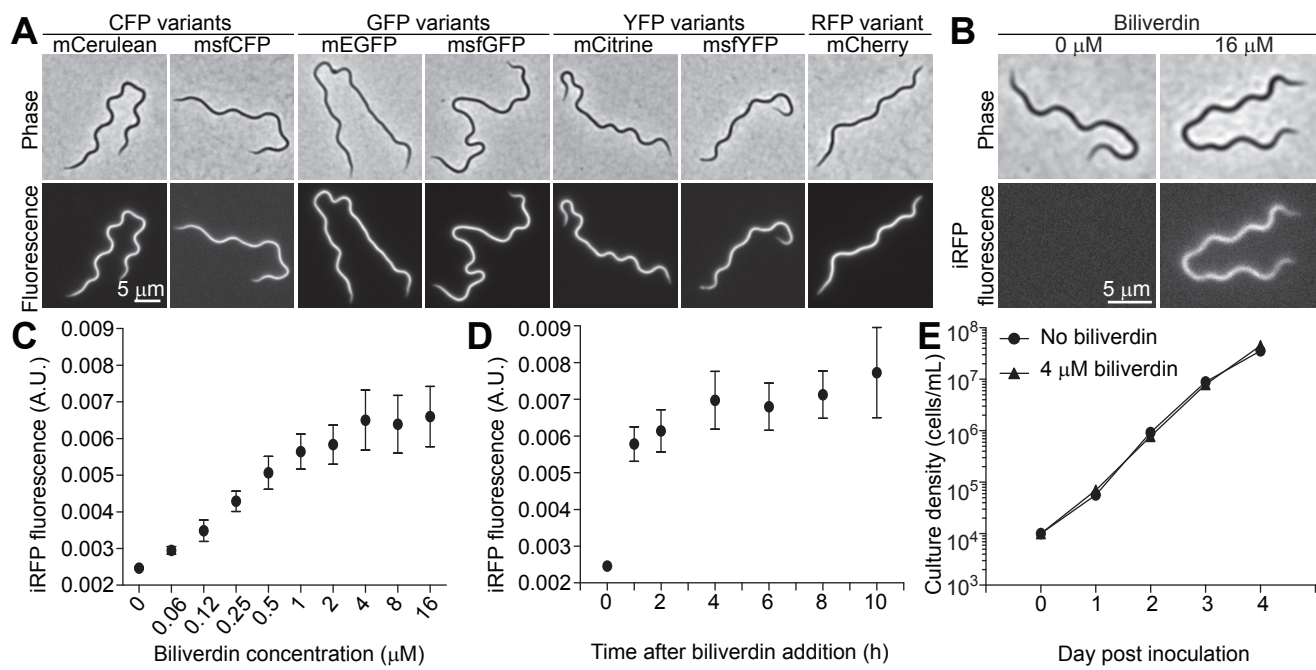

# Figure 2

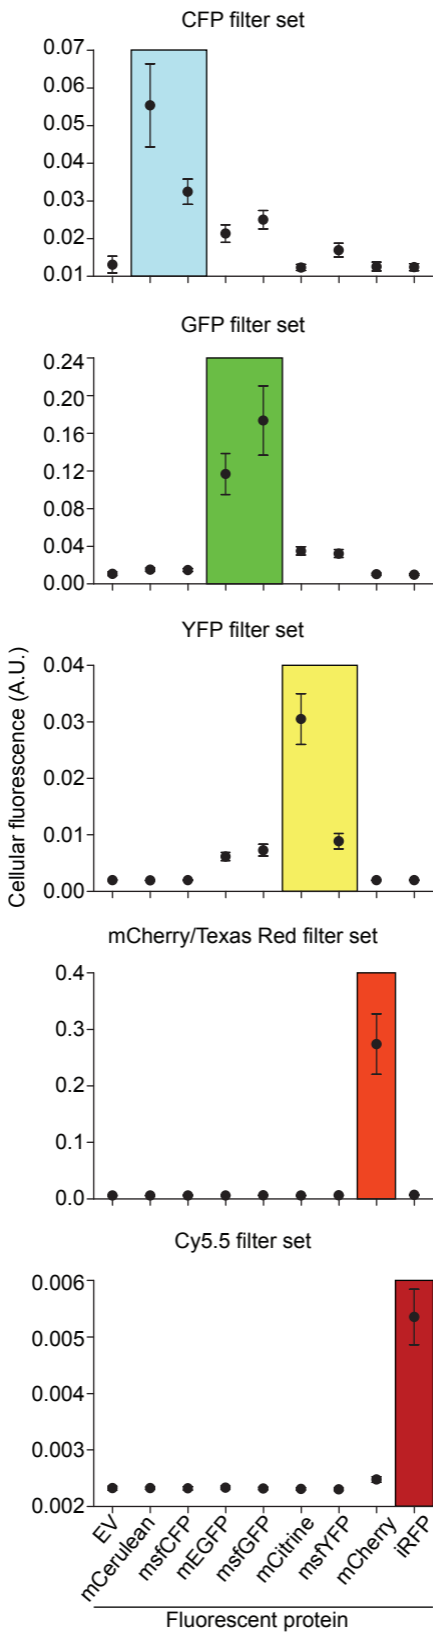

**Figure 3**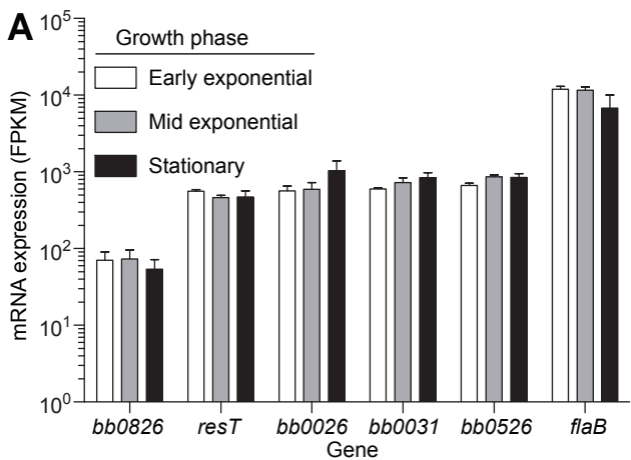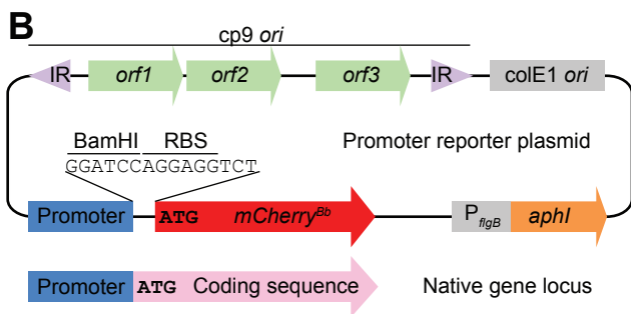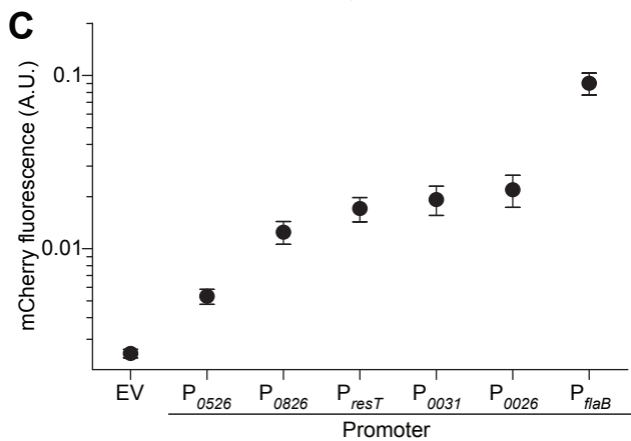

**Figure 4**

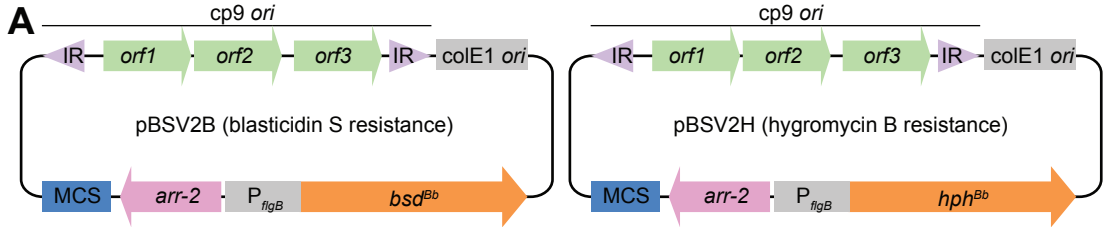

**B**

Antibiotic concentration (μg/mL)

|            | 640       | 3200         | 1600          | 160          | 4000         | 0.64 |
|------------|-----------|--------------|---------------|--------------|--------------|------|
|            | 320       | 1600         | 800           | 80           | 2000         | 0.32 |
|            | 160       | 800          | 400           | 40           | 1000         | 0.16 |
|            | 80        | 400          | 200           | 20           | 500          | 0.08 |
|            | 40        | 200          | 100           | 10           | 250          | 0.04 |
|            | 20        | 100          | 50            | 5            | 125          | 0.02 |
|            | 10        | 50           | 25            | 2.5          | 62.5         | 0.01 |
|            | 0         | 0            | 0             | 0            | 0            | 0    |
| Gentamicin | Kanamycin | Streptomycin | Blasticidin S | Hygromycin B | Erythromycin |      |

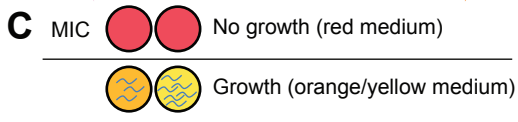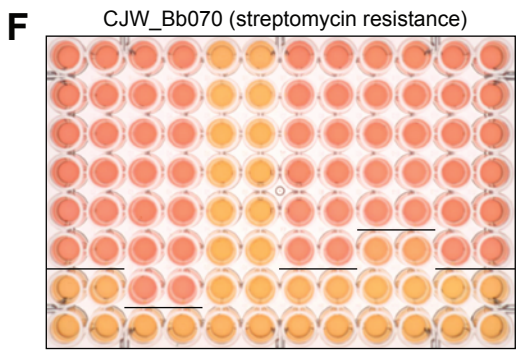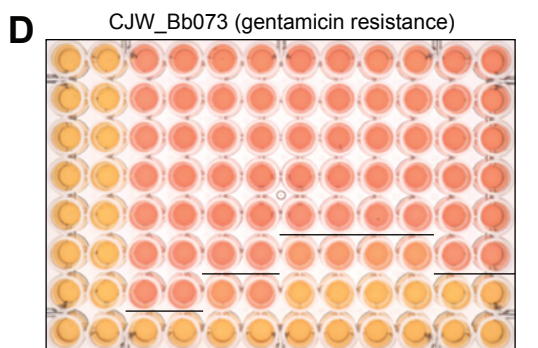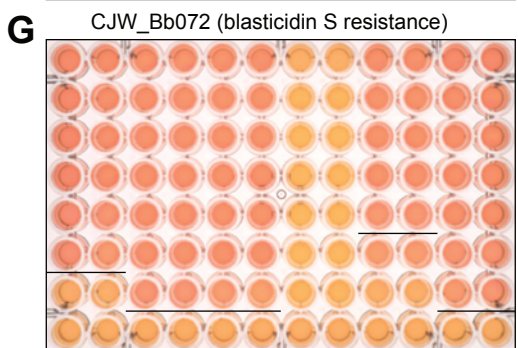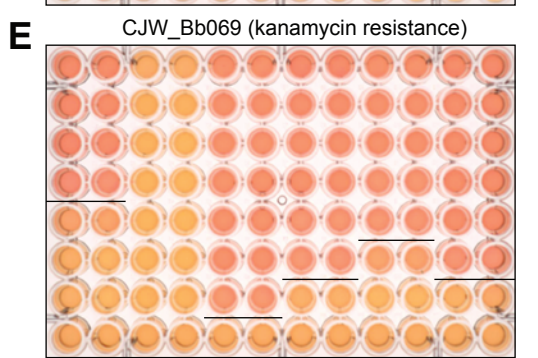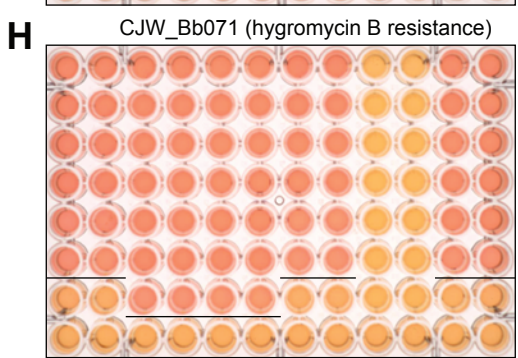

1 **Characterization of fluorescent proteins, promoters, and selectable markers for applications in the**  
2 **Lyme disease spirochete *Borrelia burgdorferi*.**

3  
4 Constantin N. Takacs, Molly Scott and Christine Jacobs-Wagner

5  
6 **SUPPLEMENTARY DATA**

7  
8 **Contents:**

9 **I. Detailed plasmid construction methods.....S1**  
10 **II. Supplementary Table: Oligonucleotide primer sequences.....S5**  
11 **III. DNA sequences of genes codon-optimised for translation in *B. burgdorferi*.....S6**  
12 **IV. Supplementary Table: Numbers of cells analysed to generate quantitative data.....S10**  
13 **V. MATLAB code.....S11**  
14 **VI. Supplementary references.....S15**

15  
16 **I. Detailed plasmid construction methods**

17 ***Mutagenesis, plasmid preparation, and cloning***

18 Site-directed mutagenesis was performed using Agilent's QuickChange Lightning Site Directed  
19 Mutagenesis Kit, as per the kit's instructions. Restriction endonucleases (regular and high-fidelity  
20 versions) and Electroligase were purchased from New England Biolabs. DNA polymerases were from  
21 Thermo Scientific (Platinum PCR Supermix), New England Biolabs (Phusion), or Takara (Prime Star).  
22 Oligonucleotide primers were synthesized at Integrated DNA Technologies and are listed in the  
23 supplementary table below. Gel extraction was performed using the Purelink Quick Gel Extraction Kit  
24 (Thermo Scientific). DNA minipreps were done using Zyppy plasmid miniprep kit (Zymo Research),  
25 while midipreps were done using the Plasmid Plus Midi Kit (Qiagen) from 50 mL of overnight  
26 *Escherichia coli* cultures in Super Broth. Correct insert DNA sequences were confirmed at Quintarabio  
27 or using an in-house Sanger DNA sequencing service at the Yale Keck Biotechnology Resource  
28 Laboratory.

29 **Expansion of the multicloning site of extant shuttle vectors.** The multicloning site of the shuttle  
30 vectors kanamycin-resistant pBSV2 (1), gentamicin-resistant pBSV2G (2) and streptomycin-resistant  
31 pKFSS1 (3) was modified to facilitate cloning by including several additional restriction enzyme sites.  
32 The modified vectors were named pBSV2\_2, BSV2G\_2, and pKFSS1\_2, respectively. The multicloning  
33 site of the original vectors contains the following restriction enzyme sites, in order: SacI-**KpnI-XmaI-**  
34 **BamHI-XbaI-SalI-PstI-SphI-HindIII**. The expanded multicloning site contains the following restriction  
35 enzyme sites, in order: SacI-**AgeI-XhoI-AatII-NheI-BamHI-XmaI-KpnI-XbaI-SalI-PstI-SphI-HindIII**.  
36 The regions of the multicloning site that were modified are marked in bold letters. We note that the  
37 AatII and XmaI sites are not unique in shuttle vector pKFSS1\_2, and that the XhoI site is not unique in  
38 shuttle vectors pBSV2\_2 and pKFSS1\_2. To construct **pBSV2G\_2**, the multicloning site of the shuttle  
39 vector was extended by annealing primers NT23 and NT24 and ligating the product into BamHI/KpnI-  
40 digested pBSV2G. To construct **pBSV2\_2**, the SacI/BbsI fragment of pBSV2G\_2 containing the  
41 extended multicloning site and part of the flagellar rod operon promoter ( $P_{flgB}$ ) was cloned into the  
42 SacI/BbsI sites of pBLS599. During derivation of pBLS599 from pBSV2, the zeocin cassette of pBSV2  
43 was removed (4). Thus, pBSV2\_2 differs from pBSV2 in that it lacks the zeocin resistance cassette and  
44 has an expanded multicloning site. To construct **pKFSS1\_2**, the BbsI/SacI fragment of pBSV2G\_2 was  
45 moved into the BbsI/SacI sites of pKFSS1.

46  
47 **New shuttle vectors carrying blasticidin S and hygromycin B antibiotic resistance markers.** To  
48 construct **pBSV2B**, the following three fragments were assembled in order into the cloning plasmid  
49 pSL1180: (i) the *arr-2* rifampicin resistance gene, including its promoter, was PCR amplified from  
50 plasmid pMCS-3 using primers NT169 and NT170, digested with AvrII and EagI, and inserted into the  
51 AvrII/EagI sites of pSL1180 to form pSL1180\_arr2, (ii) a *B. burgdorferi* codon-optimised blasticidin S  
52 deaminase gene, *bsd<sup>Bb</sup>*, was synthesized. It was then PCR amplified with NT171 and NT172, digested  
53 with PstI and MluI and inserted into the PstI/MluI sites of pSL1180\_arr2 to form pSL1180\_arr2-*bsd<sup>Bb</sup>*,  
54 (iii) the  $P_{flgB}$  sequence of pBSV2G was amplified using NT173 and NT174, digested with EagI and NdeI  
55 and inserted into the EagI/NdeI sites of pSL1180\_arr2-*bsd<sup>Bb</sup>* to yield pSL1180\_arr2- $P_{flgB}$ -*bsd<sup>Bb</sup>*. The  
56 resulting *arr2-P<sub>flgB</sub>-bsd<sup>Bb</sup>* cassette was excised using MluI and AvrII and ligated into the MluI/AvrII  
57 backbone of pBSV2G\_2. To construct **pBSV2H**, a *B. burgdorferi* codon-optimised hygromycin B  
58 resistance gene, *hph<sup>Bb</sup>*, was synthesized. This gene was moved as an NdeI/MluI fragment into the  
59 NdeI/MluI backbone of pSL1180\_arr2- $P_{flgB}$ -*bsd<sup>Bb</sup>*, an intermediate for the construction of pBSV2B (see

60 above), thereby yielding pSL1180\_arr2-P<sub>flgB</sub>-hph<sup>Bb</sup>. The resulting *arr2*-P<sub>flgB</sub>-hph<sup>Bb</sup> cassette was excised  
61 using MluI and AvrII and ligated into the MluI/AvrII backbone of pBSV2G\_2.

62  
63 **Constructs for expression of fluorescent proteins from the flagellin promoter.** *B. burgdorferi*  
64 codon-optimised fluorescent protein-coding genes *mCerulean*<sup>Bb</sup>, *mEGFP*<sup>Bb</sup>, *msfGFP*<sup>Bb</sup>, *mCitrine*<sup>Bb</sup>,  
65 *mCherry*<sup>Bb</sup>, and *iRFP*<sup>Bb</sup> were synthesized. Site-directed mutagenesis was performed on the *msfGFP*<sup>Bb</sup>  
66 sequence using primer pairs NT187/NT188 or NT189/N190 to introduce the Y66W or T203Y mutations  
67 and create the *msfCFP*<sup>Bb</sup> and *msfYFP*<sup>Bb</sup> genes, respectively. A BamHI (GGATCC) site was included  
68 immediately upstream of the START ATG codon either during gene synthesis or during PCR  
69 amplification of the fluorescent protein-encoding genes. A HindIII site was included, overlapping with  
70 and downstream of the STOP TAA codon (as a TAAGCTT sequence, with the HindIII site underlined),  
71 either during gene synthesis or during PCR amplification. *mCherry*<sup>Bb</sup> was PCR amplified using NT100  
72 and NT193. *msfCFP*<sup>Bb</sup> and *msfYFP*<sup>Bb</sup> were PCR amplified using NT160 and NT161. The  
73 BamHI/HindIII site-flanked fluorescent protein-encoding genes were released from PCR products or  
74 parental plasmids using BamHI and HindIII. The flagellin promoter (P<sub>flaB</sub>) sequence (5) was PCR  
75 amplified from *B. burgdorferi* genomic DNA using primers NT27 and NT28 and digested with SacI and  
76 BamHI. For each transcriptional fusion to P<sub>flaB</sub>, a P<sub>flaB</sub> SacI/BamHI fragment and a BamHI/HindIII  
77 fragment of the fluorescent protein-encoding gene were assembled, via intermediary constructs, into the  
78 SacI/HindIII sites of pBSV2G\_2 or pBSV2\_2, thus yielding **pBSV2G\_P<sub>flaB</sub>-mCerulean<sup>Bb</sup>,**  
79 **pBSV2G\_P<sub>flaB</sub>-msfCFP<sup>Bb</sup>, pBSV2G\_P<sub>flaB</sub>-mEGFP<sup>Bb</sup>, pBSV2G\_P<sub>flaB</sub>-msfGFP<sup>Bb</sup>, pBSV2G\_P<sub>flaB</sub>-**  
80 **mCitrine<sup>Bb</sup>, pBSV2G\_P<sub>flaB</sub>-msfYFP<sup>Bb</sup>, pBSV2G\_P<sub>flaB</sub>-mCherry<sup>Bb</sup>, pBSV2G\_P<sub>flaB</sub>-iRFP<sup>Bb</sup>, and**  
81 **pBSV2\_P<sub>flaB</sub>-mCherry<sup>Bb</sup>.**

82  
83 **Promoters for *mCherry*<sup>Bb</sup> reporter expression.** Through intermediary constructs, promoter  
84 sequences were inserted between the SacI and BamHI sites of pBSV2\_2, while the *mCherry*<sup>Bb</sup> gene was  
85 amplified using NT193 and NT342, digested using BamHI and HindIII, and inserted into the  
86 BamHI/HindIII sites of the same pBSV2\_2 backbone, resulting in kanamycin-resistant shuttle vectors  
87 carrying *mCherry*<sup>Bb</sup> transcriptional fusions. The primer NT342 contains a ribosome binding site (RBS)  
88 sequence (AGGAGG) downstream of the BamHI site (GGATCC) and upstream of the ATG start codon  
89 of the mCherry-encoding gene. The full sequence is ggatccAGGAGGctcATG, with the BamHI site and  
90 a 3-nucleotide spacer sequence in lower case letters and the ribosomal binding site (RBS) and the



91 START codon in upper case letters. The following primers and B31 genomic DNA were used to amplify  
92 the various promoters used: NT107 and NT108 (amplify nucleotides 2187 to 2371 of the reverse strand  
93 of the B31 cp26 plasmid, GenBank accession number NC\_001903) for the telomere resolvase promoter  
94  $P_{resT}$ , NT109 and NT110 (amplify nucleotides 25623 to 25751 of the reverse strand of the B31  
95 chromosome, GenBank accession number NC\_001318\_1) for  $P_{0026}$ , NT111 and NT112 (amplify  
96 nucleotides 29472 to 29669 of the reverse strand of the chromosome) for  $P_{0031}$ , NT113 and NT114  
97 (amplify nucleotides 535523 to 535703 of the forward strand of the chromosome) for  $P_{0526}$ , NT115 and  
98 NT116 (amplify nucleotides 870024 to 870235 of the reverse strand of the chromosome) for  $P_{0826}$ . The  
99 following constructs were thus obtained: **pBSV2\_  $P_{resT}$ -mCherry<sup>Bb</sup>**, **pBSV2\_  $P_{0026}$ -mCherry<sup>Bb</sup>**,  
100 **pBSV2\_  $P_{0031}$ -mCherry<sup>Bb</sup>**, **pBSV2\_  $P_{0526}$ -mCherry<sup>Bb</sup>**, **pBSV2\_  $P_{0826}$ -mCherry<sup>Bb</sup>**.

101 **II. Supplementary Table: Oligonucleotide primer sequences**

| <b>Primer name</b> | <b>Sequence<sup>a</sup> (5' to 3')</b>                          |
|--------------------|-----------------------------------------------------------------|
| NT23               | accggtctcgaggacgtcgttagcggatcccgggggtacc                        |
| NT24               | gatcggatccccgggatccgctagcgcacgtcctcgagaccgggtgac                |
| NT27               | tatagagctctgtctgtcgcctcttggtgcttcc                              |
| NT28               | cacggatcctcattcctccatgataaaatttaaattctgac                       |
| NT100              | tatggatccatggtagtaaagggaagaag                                   |
| NT107              | cgcgagctccgaagttattttatgatt                                     |
| NT108              | cgcgatccattaattcaattataccaag                                    |
| NT109              | gtcgaagctctattctcattctttaaattattatcc                            |
| NT110              | cacggatcctaagattaccttaattatacttag                               |
| NT111              | caggagctcgttgatataaactaaaagcaatattattgtg                        |
| NT112              | gacggatccaacctaacctcaagaattaaataac                              |
| NT113              | tatgagctcctgtttcaatgataggtttttagg                               |
| NT114              | tatggatccatgatgattctaatcataaaaaatcaaaatc                        |
| NT115              | tatgagctcggcaatagaagaatctatagaaagc                              |
| NT116              | cacggatccaatttattataaactcattgctgtaac                            |
| NT160              | cgcaagcttatttataaattcatccatccatgagtaatacc                       |
| NT161              | tatggatccatgagtaaagggaagaattattactggtg                          |
| NT169              | cagcctagggttaattctcaataacatgaaaccacg                            |
| NT170              | tatggccgcatggctgttatgactg                                       |
| NT171              | tatctgcagcatatggctaaacctttaagtcaag                              |
| NT172              | tatacgcgtaagccgatctcggcttg                                      |
| NT173              | tatggccgtaccgagcttcaaggaag                                      |
| NT174              | gagcatatgatgaaacctccctcatttaaattgc                              |
| NT187              | ctactaaaacattgaacacccaagftaaagtagtaactaaagtaggccaag             |
| NT188              | cttgccctactttagttactcttaactggggtgtcaatgttttagtag                |
| NT189              | ctttacttaatttactttgataacttaataatgattatcaggtataaaacaggaccatcac   |
| NT190              | gtgatggctctgtttattacctgataatcattatthaagttatcaaagtaaattaagtaaaga |
| NT193              | cagaagcttatttataaattcatccataccactg                              |
| NT342              | tatggatccaggaggtcatggtagtaaagggaagaagataatgg                    |

<sup>a</sup>Restriction enzyme sites are underlined in the primer sequence

103 **III. DNA sequences of genes codon-optimised for translation in *B. burgdorferi***

104 *bsd<sup>Bb</sup>*:

105 5'ATGGCTAAACCTTTAAGTCAAGAAGAAAGTACTTTAATTGAAAGAGCTACTGCTACTATTAATAGT  
106 ATTCCTATTAGTGAAGATTATAGTGTTGCTAGTGCTGCTTTAAGTAGTGATGGTAGAATTTTTACTGG  
107 TGTTAATGTTTATCATTCTACTGGTGGTCCTTGTGCTGAATTAGTTGTTTTAGGTAAGTCCCGCGCTG  
108 CTGCTGCTGGTAATCTCACTTGTATTGTTGCTATTGGTAATGAAAATAGAGGTATTTAAGTCCTTGT  
109 GGTAGATGTAGACAAGTTTTATTAGATTTACATCCTGGTATTAAGCTATTGTTAAAGATAGTGATG  
110 GTCAACCTACTGCTGTTGGTATTAGAGAATTATTACCTAGTGGTTATGTTTGGGAAGGTTAA3'

111 *hph<sup>Bb</sup>*:

112 5'ATGGATAGAAGTGGTAAACCTGAATTAAGTACTAGTGTTGAAAAATTTTTAATTGAAAAATTT  
113 GATAGTGTTAGTGATTTAATGCAATTAAGTGAAGGTGAAGAAAGTAGAGCTTTTAGTTTTGATGTTG  
114 GTGGTAGAGGTTATGTTTTAAGAGTTAATAGTTGTGCTGATGGTTTTTATAAAGATAGATATGTTTAT  
115 AGACATTTTGCTAGTGCTGCTTTACCTATTCCTGAAGTTTTAGATATTGGTGAATTTAGTGAAAGTTT  
116 AACTTATTGTATTAGTAGAAGAGCACAAAGGTGTTACTTTACAAGATTTACCTGAAACTGAATTACCT  
117 GCTGTTTTACAACCTGTTGCTGAAGCTATGGATGCTATTGCGGCGGCTGATCTCAGTCAAACCTTCGG  
118 GTTTTGGTCCTTTTGGTCTCAAGGTATTGGTCAATACTACTTGGAGAGATTTTATTTGTGCTATT  
119 GCTGATCCTCATGTTTATCATTGGCAAACCTGTTATGGATGATACTGTTAGTGCTAGTGTTGCTCAAGC  
120 ATTAGATGAATTAATGTTATGGGCTGAAGATTGTCCTGAAGTTAGACATTTAGTTCATGCTGATTTTTG  
121 GTAGTAATAATGTTTTAAGTATAATGGTGAATTAAGTACTGCTGTTATTGATTGGAGTGAAGCTATGTTT  
122 GGTGATAGTCAATATGAAGTTGCTAATATTTTTTTTTGGAGACCTTGGTTAGCTTGTATGGAACAAC  
123 AAAGTATGATATTTTGAAGAAGACATCCTGAATTAGCTGGTAGTCTAGATTAAGAGCTTATATGTT  
124 AAGAATTGGTTTAGATCAATTATATCAAAGTTTAGTTGATGGTAATTTTGATGATGCTGCTTGGGCTC  
125 AAGGTAGATGTGATGCTATTGTTAGAAGTGGTGTGCTGGTACTGTTGGTGAAGTCAAATTGCTAGAAG  
126 AAGTGTGCTGCTGTTTGGACTGATGGTTGTGTTGAAGTTTTAGCTGATAGTGGTAATAGAAGACCTAGT  
127 ACTAGACCTAGAGCTAAAGAATAA3'

128 *mCerulean<sup>Bb</sup>*:

129 5'ATGGTTAGTAAAGGTGAAGAATTATTTACTGGTGTGTTTCCTATTTTAGTTGAATTAGATGGTGATG  
130 TTAATGGTCATAAATTTAGTGTTAGTGGTGAAGGTGAAGGTGATGCTACTTATGGTAAATTAAGTTT  
131 AAAATTTATTTGTAAGTACTGGTAAATTACCTGTTTCCTTGGCCTACTTTAGTTACTACTTTAACTTGGG  
132 GTGTTCAATGTTTTGCTAGATATCCTGATCATATGAAACAACATGATTTTTTTAAAAGTGCTATGCCT  
133 GAAGGTTATGTTCAAGAAAGGACTATTTTCTTCAAAGATGATGGTAATTATAAACTAGAGCTGAA  
134 GTTAAATTTGAAGGTGATACTTTAGTTAATAGAATTGAATTAAGGTTAGTTTAAAGAAGATG  
135 GTAATATTTTAGGTCATAAATTAGAATATAATGCTATTAGTGATAATGTTTATATTACAGCTGATAA  
136 ACAAAAAAATGGTATTAAGCTAATTTTAAAATTAGACATAATATTGAAGATGGTAGTGTTCAATTA  
137 GCTGATCATTATCAACAAAATACTCCTATTGGTGTGATGGTCTGTTTTATTACCTGATAATCATTATTT  
138 AAGTACTCAAAGTAAATTAAGTAAAGATCCTAATGAAAAAAGAGATCATATGGTTTTATTAGAATTT  
139 GTTACTGCTGCTGGTATTACTTTAGGTATGGATGAATTATATAAATAA3'

140 *msfCFP<sup>Bb</sup>*:

141 5'ATGAGTAAAGGTGAAGAATTATTTACTGGTGTGTTCCCTATTTTAGTTGAATTAGATGGTGATGTTA  
142 ATGGTCATAAATTTAGTGTTAGAGGTGAAGGTGAAGGTGATGCTACTAATGGTAAATTAACCTTAA  
143 ATTTATTTGTACTACTGGTAAATTACCTGTTCCCTTGGCCTACTTTAGTTACTACTTTAACTTGGGGTGT  
144 TCAATGTTTTAGTAGATATCCTGATCATATGAAAAGACATGATTTTTTTAAAAGTGCTATGCCTGAA  
145 GGTTATGTTCAAGAAAGAAGACTATTAGTTTTAAAGATGATGGTACTTATAAACTAGAGCTGAAGTTA  
146 AATTTGAAGGTGATACTTTAGTTAATAGAATTGAATTA AAAAGGTATTGATTTTTAAAGAAGATGGTAA  
147 TATTTAGGTCATAAATTAGAATATAATTTTAATAGTCATAATGTTTATATTACTGCTGATAAACAAA  
148 AAAATGGTATTAAGCTAATTTTTAAAATTAGACATAATGTTGAAGATGGTAGTGTTCAATTAGCTGA  
149 TCATTATCAACAAAATACTCCTATTGGTGATGGTCCTGTTTTATTACCTGATAATCATTATTTAAGTA  
150 CTCAAAGTAAATTAAGTAAAGATCCTAATGAAAAAAGAGATCATATGGTTTTATTAGAATTTGTTAC  
151 TGCTGCTGGTATTACTCATGGTATGGATGAATTATATAAATAA3'

152 *mEGFP<sup>Bb</sup>*:

153 5'ATGGTTAGTAAAGGTGAAGAATTATTTACTGGTGTGTTCCCTATTTTAGTTGAATTAGATGGTGATG  
154 TTAATGGTCATAAATTTAGTGTTAGTGGTGAAGGTGAAGGTGATGCTACTTATGGTAAATTAACCTT  
155 AAAATTTATTTGTACTACTGGTAAATTACCTGTTCCCTTGGCCTACTTTAGTTACTACTTTAACTTATG  
156 GTGTTCAATGTTTTAGTAGATATCCTGATCATATGAAACAACATGATTTTTTTAAAAGTGCTATGCCT  
157 GAAGGTTATGTTCAAGAAAGGACTATTTTCTTCAAAGATGATGGTAATTATAAACTAGAGCTGAA  
158 GTTAAATTTGAAGGTGATACTTTAGTTAATAGAATTGAATTA AAAAGGTATTGATTTTTAAAGAAGATG  
159 GTAATATTTTAGGTCATAAATTAGAATATAATTATAATAGTCATAATGTTTATATTATGGCTGATAA  
160 ACAAAAAAATGGTATTAAGTTAATTTTTAAAATTAGACATAATATTGAAGATGGTAGTGTTCAATTA  
161 GCTGATCATTATCAACAAAATACTCCTATTGGTGATGGTCCTGTTTTATTACCTGATAATCATTATTT  
162 AAGTACTCAAAGTAAATTAAGTAAAGATCCTAATGAAAAAAGAGATCATATGGTTTTATTAGAATTT  
163 GTTACTGCTGCTGGTATTACTTTAGGTATGGATGAATTATATAAATAA3'

164 *msfGFP<sup>Bb</sup>*:

165 5'ATGAGTAAAGGTGAAGAATTATTTACTGGTGTGTTCCCTATTTTAGTTGAATTAGATGGTGATGTTA  
166 ATGGTCATAAATTTAGTGTTAGAGGTGAAGGTGAAGGTGATGCTACTAATGGTAAATTAACCTTAA  
167 ATTTATTTGTACTACTGGTAAATTACCTGTTCCCTTGGCCTACTTTAGTTACTACTTTAACTTATGGTGT  
168 TCAATGTTTTAGTAGATATCCTGATCATATGAAAAGACATGATTTTTTTAAAAGTGCTATGCCTGAA  
169 GGTTATGTTCAAGAAAGAAGACTATTAGTTTTAAAGATGATGGTACTTATAAACTAGAGCTGAAGTTA  
170 AATTTGAAGGTGATACTTTAGTTAATAGAATTGAATTA AAAAGGTATTGATTTTTAAAGAAGATGGTAA  
171 TATTTAGGTCATAAATTAGAATATAATTTTAATAGTCATAATGTTTATATTACTGCTGATAAACAAA  
172 AAAATGGTATTAAGCTAATTTTTAAAATTAGACATAATGTTGAAGATGGTAGTGTTCAATTAGCTGA  
173 TCATTATCAACAAAATACTCCTATTGGTGATGGTCCTGTTTTATTACCTGATAATCATTATTTAAGTA  
174 CTCAAAGTAAATTAAGTAAAGATCCTAATGAAAAAAGAGATCATATGGTTTTATTAGAATTTGTTAC  
175 TGCTGCTGGTATTACTCATGGTATGGATGAATTATATAAATAA3'

176 *mCitrine<sup>Bb</sup>*:  
177 5'ATGGTTAGTAAAGGTGAAGAATTATTTACTGGTGTGTTCCCTATTTTAGTTGAATTAGATGGTGATG  
178 TTAATGGTCATAAATTTAGTGTTAGTGGTGAAGGTGAAGGTGATGCTACTTATGGTAAATTAACCTTT  
179 AAAATTTATTTGTACTACTGGTAAATTACCTGTTCCCTGGCCTACTTTAGTTACTACTTTTGGATATG  
180 GTTTAATGTGTTTTGCTAGATATCCTGATCATATGAAACAACATGATTTTTTTAAAAGTGCTATGCCT  
181 GAAGGTTATGTTCAAGAAAGGACTATTTTCTTCAAAGATGATGGTAATTATAAACTAGAGCTGAA  
182 GTTAAATTTGAAGGTGATACTTTAGTTAATAGAATTGAATTAAGGTATTGATTTTTAAAGAAGATG  
183 GTAATATTTTAGGTCATAAATTAGAATATAATTATAATAGTCATAATGTTTATATTATGGCTGATAA  
184 ACAAAAAAATGGTATTAAGTTAATTTTTAAAATTAGACATAATATTGAAGATGGTAGTGTTCAATTA  
185 GCTGATCATTATCAACAAAATACTCCTATTGGTGATGGTCCTGTTTTATTACCTGATAATCATTATTT  
186 AAGTTATCAAAGTAAATTAAGTAAAGATCCTAATGAAAAAAGAGATCATATGGTTTTATTAGAATTT  
187 GTTACTGCTGCTGGTATTACTTTAGGTATGGATGAATTATATAAATAA3'

188 *msfYFP<sup>Bb</sup>*:  
189 5'ATGAGTAAAGGTGAAGAATTATTTACTGGTGTGTTCCCTATTTTAGTTGAATTAGATGGTGATGTTA  
190 ATGGTCATAAATTTAGTGTTAGAGGTGAAGGTGAAGGTGATGCTACTAATGGTAAATTAACCTTTAAA  
191 ATTTATTTGTACTACTGGTAAATTACCTGTTCCCTGGCCTACTTTAGTTACTACTTTAACTTATGGTGT  
192 TCAATGTTTTAGTAGATATCCTGATCATATGAAAAGACATGATTTTTTTAAAAGTGCTATGCCTGAA  
193 GGTTATGTTCAAGAAAGAAGACTATTAGTTTTAAAGATGATGGTACTTATAAACTAGAGCTGAAGTTA  
194 AATTTGAAGGTGATACTTTAGTTAATAGAATTGAATTAAGGTATTGATTTTTAAAGAAGATGGTAA  
195 TATTTTAGGTCATAAATTAGAATATAATTTTAAATAGTCATAATGTTTATATTACTGCTGATAAACAAA  
196 AAAATGGTATTAAGCTAATTTTTAAAATTAGACATAATGTTGAAGATGGTAGTGTTCAATTAGCTGA  
197 TCATTATCAACAAAATACTCCTATTGGTGATGGTCCTGTTTTATTACCTGATAATCATTATTTAAGTT  
198 ATCAAAGTAAATTAAGTAAAGATCCTAATGAAAAAAGAGATCATATGGTTTTATTAGAATTTGTTAC  
199 TGCTGCTGGTATTACTCATGGTATGGATGAATTATATAAATAA3'

200 *mCherry<sup>Bb</sup>*:  
201 5'ATGGTTAGTAAAGGTGAAGAAGATAATATGGCTATTATTAAGAATTTATGAGATTTAAAGTTCAC  
202 ATGGAAGGTAGTGTTAATGGTCATGAATTTGAAATTGAAGGTGAAGGTGAAGGTAGACCTTATGAA  
203 GGTACTCAAAGTCTAAATTAAGTTACTAAAGGTGGTCCTTTACCTTTTGCTTGGGATATTTTAAAG  
204 TCCTCAATTTATGTATGGTAGTAAAGCATAACGTTAAACATCCTGCTGATATTCCTGATTATTTAAAT  
205 TAAGTTTTCCCTGAAGGTTTTAAATGGGAAAGAGTTATGAATTTTGAAGATGGTGGTGTGTTACTGT  
206 TACTCAAGATAGTAGTTTACAAGATGGTGAATTTATTTATAAAGTTAAATTAAGAGGTACTAATTTT  
207 CCTAGTGATGGTCCTGTTATGCAAAAAAACTATGGGTTGGGAAGCTAGTAGTAAAGAATGTAT  
208 CCTGAAGATGGTGCTTTAAAAGGTGAAATTAACAAAGATTAATAAAGATGGTGGTCATTAT  
209 GATGCTGAAGTTAAAAGTACTTATAAAGCTAAAAAACCTGTTCAATTACCTGGTGCTTATAATGTTA  
210 ATATTAATAGATATTACTTCGCATAATGAAGATTATACTATTGTTGAACAATATGAAAGAGCTGA  
211 AGGTAGACATAGTACAGGTGGTATGGATGAATTATATAAATAA3'

212 *iRFP<sup>Bb</sup>*:  
213 5'ATGGCTGAAGGTAGTGTTGCTAGGCAGCCTGACTTATTAACCTGTGACGATGAACCTATTCATATT  
214 CCTGGTGCTATTCAACCTCATGGTTTATTATTAGCTTTAGCTGCTGATATGACTATTGTTGCTGGTAG  
215 TGATAATTTACCTGAATTAACCTGGTTTAGCTATTGGTGCTTTAATTGGTAGAAGTGCTGCTGATGTTT  
216 TTGATAGTGAAACTCATAATAGATTAACCTATTGCTTTAGCTGAACCTGGTGCTGCTGTTGGTGCTCCT  
217 ATTACTGTTGGTTTTACTATGAGAAAAGATGCTGGTTTTATTGGTAGTTGGCATAGACATGATCAATT  
218 AATTTTTTTAGAATTAGAACCTCCTCAAAGAGATGTTGCTGAACCTCAAGCATTTTTTAGAAGA  
219 AATAGTGCTATTAGAAGATTACAAGCTGCTGAACTTTAGAAAGTGCTTGTGCTGCTGCTGCTCAAG  
220 AAGTTAGAAAAATTACTGGTTTTGATAGAGTTATGATTTATAGATTTGCTAGTGATTTTAGTGGTGA  
221 AGTTATTGCTGAAGATAGATGTGCTGAAGTTGAAAGTAAATTAGGTTTACATTATCCTGCTAGTACT  
222 GTTCCTGCTCAAGCTAGAAGATTATATACTATTAATCCTGTTAGAATTATCCTGATATTAATTATAG  
223 ACCTGTTCCCTGTTACTCCTGATTTAAATCCTGTTACTGGTAGACCTATTGATTTAAGTTTTGCTATTTT  
224 AAGAAGTGTTAGTCCTGTTCAATTTAGAATTTATGAGAAATATTGGTATGCATGGTACTATGAGTATT  
225 AGTATTTTAAGAGGTGAAAGATTATGGGGTTTAATTGTTTGTTCATCATAGAACTCCTTATTATGTTGA  
226 TTTAGATGGTAGACAAGCATGTGAATTAGTTGCTCAAGTTTTAGCTTGGCAAATTGGTGTTATGGAA  
227 GAATAA3'

228 **IV. Supplementary Table: Numbers of cells analysed to generate quantitative data**

| <b>Figure</b> | <b>Data point</b> | <b>Number of cells imaged</b> | <b>Strain imaged</b> |
|---------------|-------------------|-------------------------------|----------------------|
| Figure 1C     | 0 $\mu$ M         | 121                           | CJW_Bb100            |
|               | 0.06 $\mu$ M      | 200                           |                      |
|               | 0.12 $\mu$ M      | 207                           |                      |
|               | 0.25 $\mu$ M      | 161                           |                      |
|               | 0.5 $\mu$ M       | 156                           |                      |
|               | 1 $\mu$ M         | 147                           |                      |
|               | 2 $\mu$ M         | 162                           |                      |
|               | 4 $\mu$ M         | 86                            |                      |
|               | 8 $\mu$ M         | 168                           |                      |
|               | 16 $\mu$ M        | 137                           |                      |
| Figure 1D     | 0 h               | 78                            | CJW_Bb100            |
|               | 1 h               | 92                            |                      |
|               | 2 h               | 110                           |                      |
|               | 4 h               | 86                            |                      |
|               | 6 h               | 82                            |                      |
|               | 8 h               | 103                           |                      |
|               | 10 h              | 68                            |                      |
| Figure 2      | EV                | 307                           | CJW_Bb073            |
|               | mCerulean         | 219                           | CJW_Bb095            |
|               | msfCFP            | 117                           | CJW_Bb091            |
|               | mEGFP             | 135                           | CJW_Bb094            |
|               | msfGFP            | 144                           | CJW_Bb090            |
|               | mCitrine          | 308                           | CJW_Bb096            |
|               | msfYFP            | 214                           | CJW_Bb092            |
|               | mCherry           | 119                           | CJW_Bb093            |
|               | iRFP              | 209                           | CJW_Bb100            |
| Figure 3C     | EV                | 134                           | CJW_Bb069            |
|               | $P_{0526}$        | 102                           | CJW_Bb111            |
|               | $P_{0826}$        | 160                           | CJW_Bb112            |
|               | $P_{resT}$        | 148                           | CJW_Bb108            |
|               | $P_{0031}$        | 127                           | CJW_Bb110            |
|               | $P_{0026}$        | 97                            | CJW_Bb109            |
|               | $P_{flaB}$        | 136                           | CJW_Bb146            |

229

230 **V. MATLAB code**

231 The functions CL\_getframe.m, CL\_removeCell.m, CL\_cellId2PositionInFrame.m, and getextradata.m  
232 were previously described (6). They are available as part of the open-source, free software package  
233 Oufiti, which may be downloaded from <http://oufti.org/> .

234 *AddMeshtoCellList.m*

235 This script curates the cell list generated by Oufiti. It removes cells that do not have meshes, adds extra fields to  
236 the cell structures (e.g. area or cell length), and converts area from pixel<sup>2</sup> to μm<sup>2</sup>.

```
237 %*****
238 %%% removing cells that do not have meshes %%%
239 for ii = 1:length(cellList.meshData)
240     [~,cellIds] = CL_getFrame(ii,cellList);
241     if cellIds == 0, continue;end
242     for jj = cellIds
243         if
244             ~isfield(cellList.meshData{ii}{CL_cellId2PositionInFrame(jj,ii,cellList)}, 'mesh')
245             cellList = CL_removeCell(jj,ii,cellList);
246         end
247     end
248 end
249 %*****
250
251 %*****
252 %%% adding extra fields to cell structures such as area, length, etc %%%
253 for ii = 1:length(cellList.meshData)
254     for jj = 1:length(cellList.meshData{ii})
255         cellList.meshData{ii}{jj} = getextradata(cellList.meshData{ii}{jj});
256     end
257 end
258 %*****
259
260 cellList = Area_to_microns2(cellList);
```



```

261 Area_to_microns2.m
262
263 This function converts cell area from pixel2 to μm2 using the measured conversion factor 0.0642 μm/pixel that is
264 specific to our microscope setup
265
266 function cellList = Area_to_microns2(cellList)
267 %{
268 -About-
269 converts the area field of a cellList from pixels2 to microns2 given the
270 conversion unit 0.0642
271
272 -Inputs-
273 cellList: an Oufiti cellList with area added
274
275 -varargin-
276 N/A
277
278 -Outputs-
279 cellList: the input cellList with the area field converted to um2
280
281 -Example-
282 converted_cellList = Area_to_micron2(cellList)
283
284 -Supplementary-
285 N/A
286
287 -Keywords-
288 cellList area
289
290 -Dependencies-
291 N/A
292
293 -References-
294
295 -Author-
296 Brad Parry, 2018 June 25
297 %}
298
299 %the number of microns in onepixel
300 pixel_2_um = 0.0642;
301
302 no_conversion_performed = true;
303 for F = 1:length(cellList.meshData)
304     for C = 1:length(cellList.meshData{F})
305         if isempty(cellList.meshData{F}{C}) ||
306 ~isfield(cellList.meshData{F}{C}, 'area') || isempty(cellList.meshData{F}{C}.area)
307             continue
308         end
309         cellList.meshData{F}{C}.area = cellList.meshData{F}{C}.area *
310 (pixel_2_um^2);
311         no_conversion_performed = false;
312     end
313 end
314 if no_conversion_performed

```

```
315         disp('no area conversion was performed. check that the cellList has the field
316 area')
317     end
318 end
```

319 ***CalculateFluorPerCell.m***

320 The function CalculateFluorPerCell uses an Oufiti-generated cellList as input (containing the fluorescence signal  
321 intensity information that was added in Oufiti) and calculates the value of the total cell fluorescence (in arbitrary  
322 units) divided by the area of the cell (in  $\mu\text{m}^2$ ).

```
323 %This is a short script to determine the distribution of fluorescence per
324 %unit area on a per cell basis
325
326 %Application: Calculating the differences in promoter strength for Bb
327
328 function normalized_fluorescence = CalculateFluorPerCell(cellList)
329 %Determine the average fluorescence per cell
330 normalized_fluorescence = [];
331 for ii = 1:length(cellList.meshData)
332     for jj = 1:length(cellList.meshData{ii})
333         cellList.meshData{ii}{jj} = getextradata(cellList.meshData{ii}{jj});
334         if isfield(cellList.meshData{ii}{jj}, 'area')
335             fluor_per_unit_area = sum(cellList.meshData{ii}{jj}.signal1) /
336 cellList.meshData{ii}{jj}.area;
337             normalized_fluorescence{end+1} = fluor_per_unit_area;
338         end
339     end
340 end
341 normalized_fluorescence = cell2mat(normalized_fluorescence);
```

342 **VI. Supplementary references**

- 343 1. Stewart, P.E., Thalken, R., Bono, J.L. and Rosa, P. (2001) Isolation of a circular plasmid region sufficient  
344 for autonomous replication and transformation of infectious *Borrelia burgdorferi*. *Molecular*  
345 *microbiology*, **39**, 714-721.
- 346 2. Elias, A.F., Bono, J.L., Kupko, J.J., 3rd, Stewart, P.E., Krum, J.G. and Rosa, P.A. (2003) New antibiotic  
347 resistance cassettes suitable for genetic studies in *Borrelia burgdorferi*. *Journal of molecular microbiology*  
348 *and biotechnology*, **6**, 29-40.
- 349 3. Frank, K.L., Bundle, S.F., Kresge, M.E., Eggers, C.H. and Samuels, D.S. (2003) *aadA* confers  
350 streptomycin resistance in *Borrelia burgdorferi*. *Journal of bacteriology*, **185**, 6723-6727.
- 351 4. Babb, K., McAlister, J.D., Miller, J.C. and Stevenson, B. (2004) Molecular characterization of *Borrelia*  
352 *burgdorferi* *erp* promoter/operator elements. *Journal of bacteriology*, **186**, 2745-2756.
- 353 5. Bono, J.L., Elias, A.F., Kupko, J.J., 3rd, Stevenson, B., Tilly, K. and Rosa, P. (2000) Efficient targeted  
354 mutagenesis in *Borrelia burgdorferi*. *Journal of bacteriology*, **182**, 2445-2452.
- 355 6. Paintdakhi, A., Parry, B., Campos, M., Irnov, I., Elf, J., Surovtsev, I. and Jacobs-Wagner, C. (2016) Oufi:  
356 an integrated software package for high-accuracy, high-throughput quantitative microscopy analysis.  
357 *Molecular microbiology*, **99**, 767-777.

358
